# Supplementary material for: Peptidoglycan-Chi3l1 interaction shapes gut microbiota in intestinal mucus layer
Source: eLife journal article supplement (doi:10.7554/elife.92994), 2024-02-02

Raw unedited membranes

## Figure 1—Source Data 1

Figure 1C

Cropped and labelled membranes

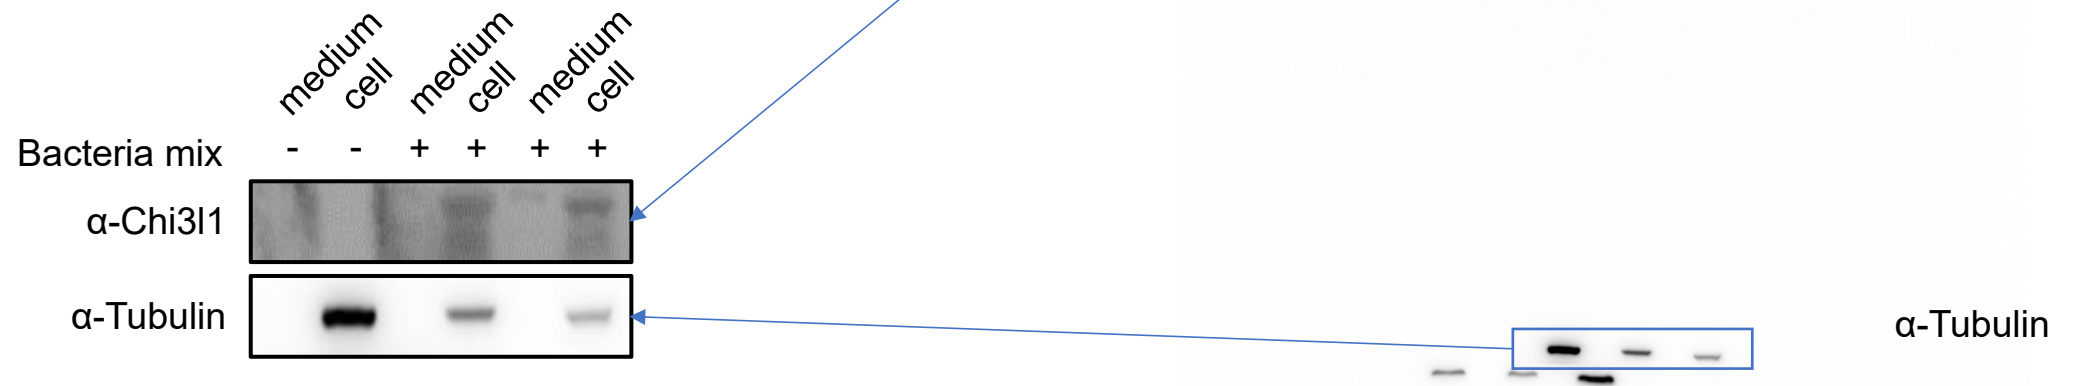

# Figure 1—Source Data 1

Raw unedited membranes

Figure 1D

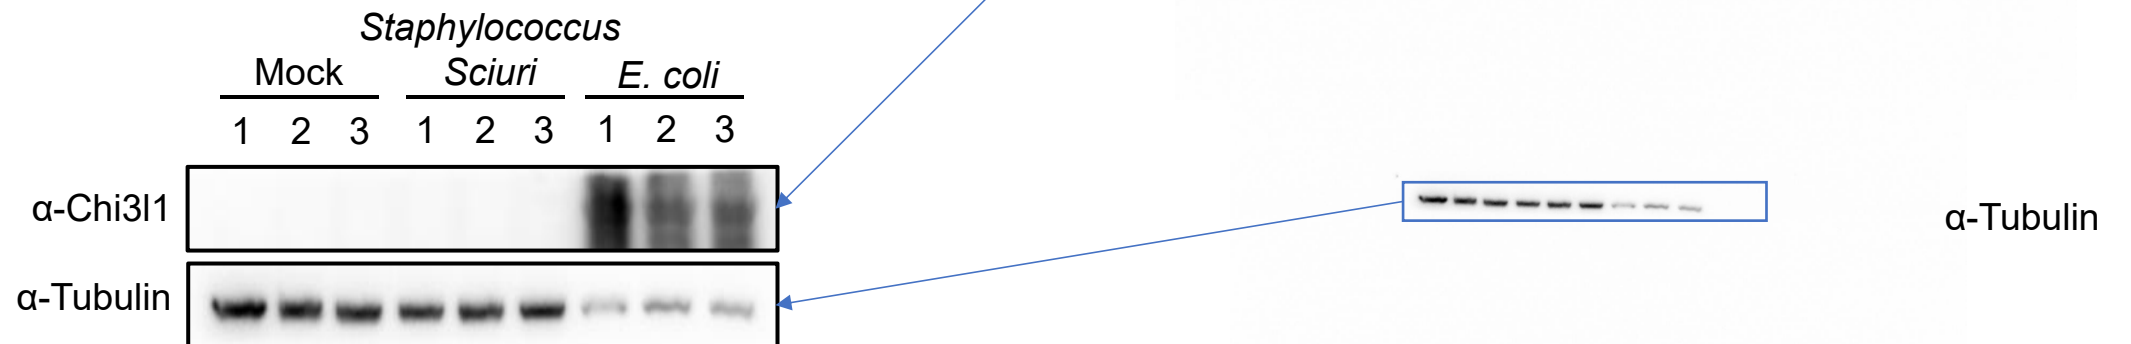

# Figure 1—Source Data 1

Figure 1E

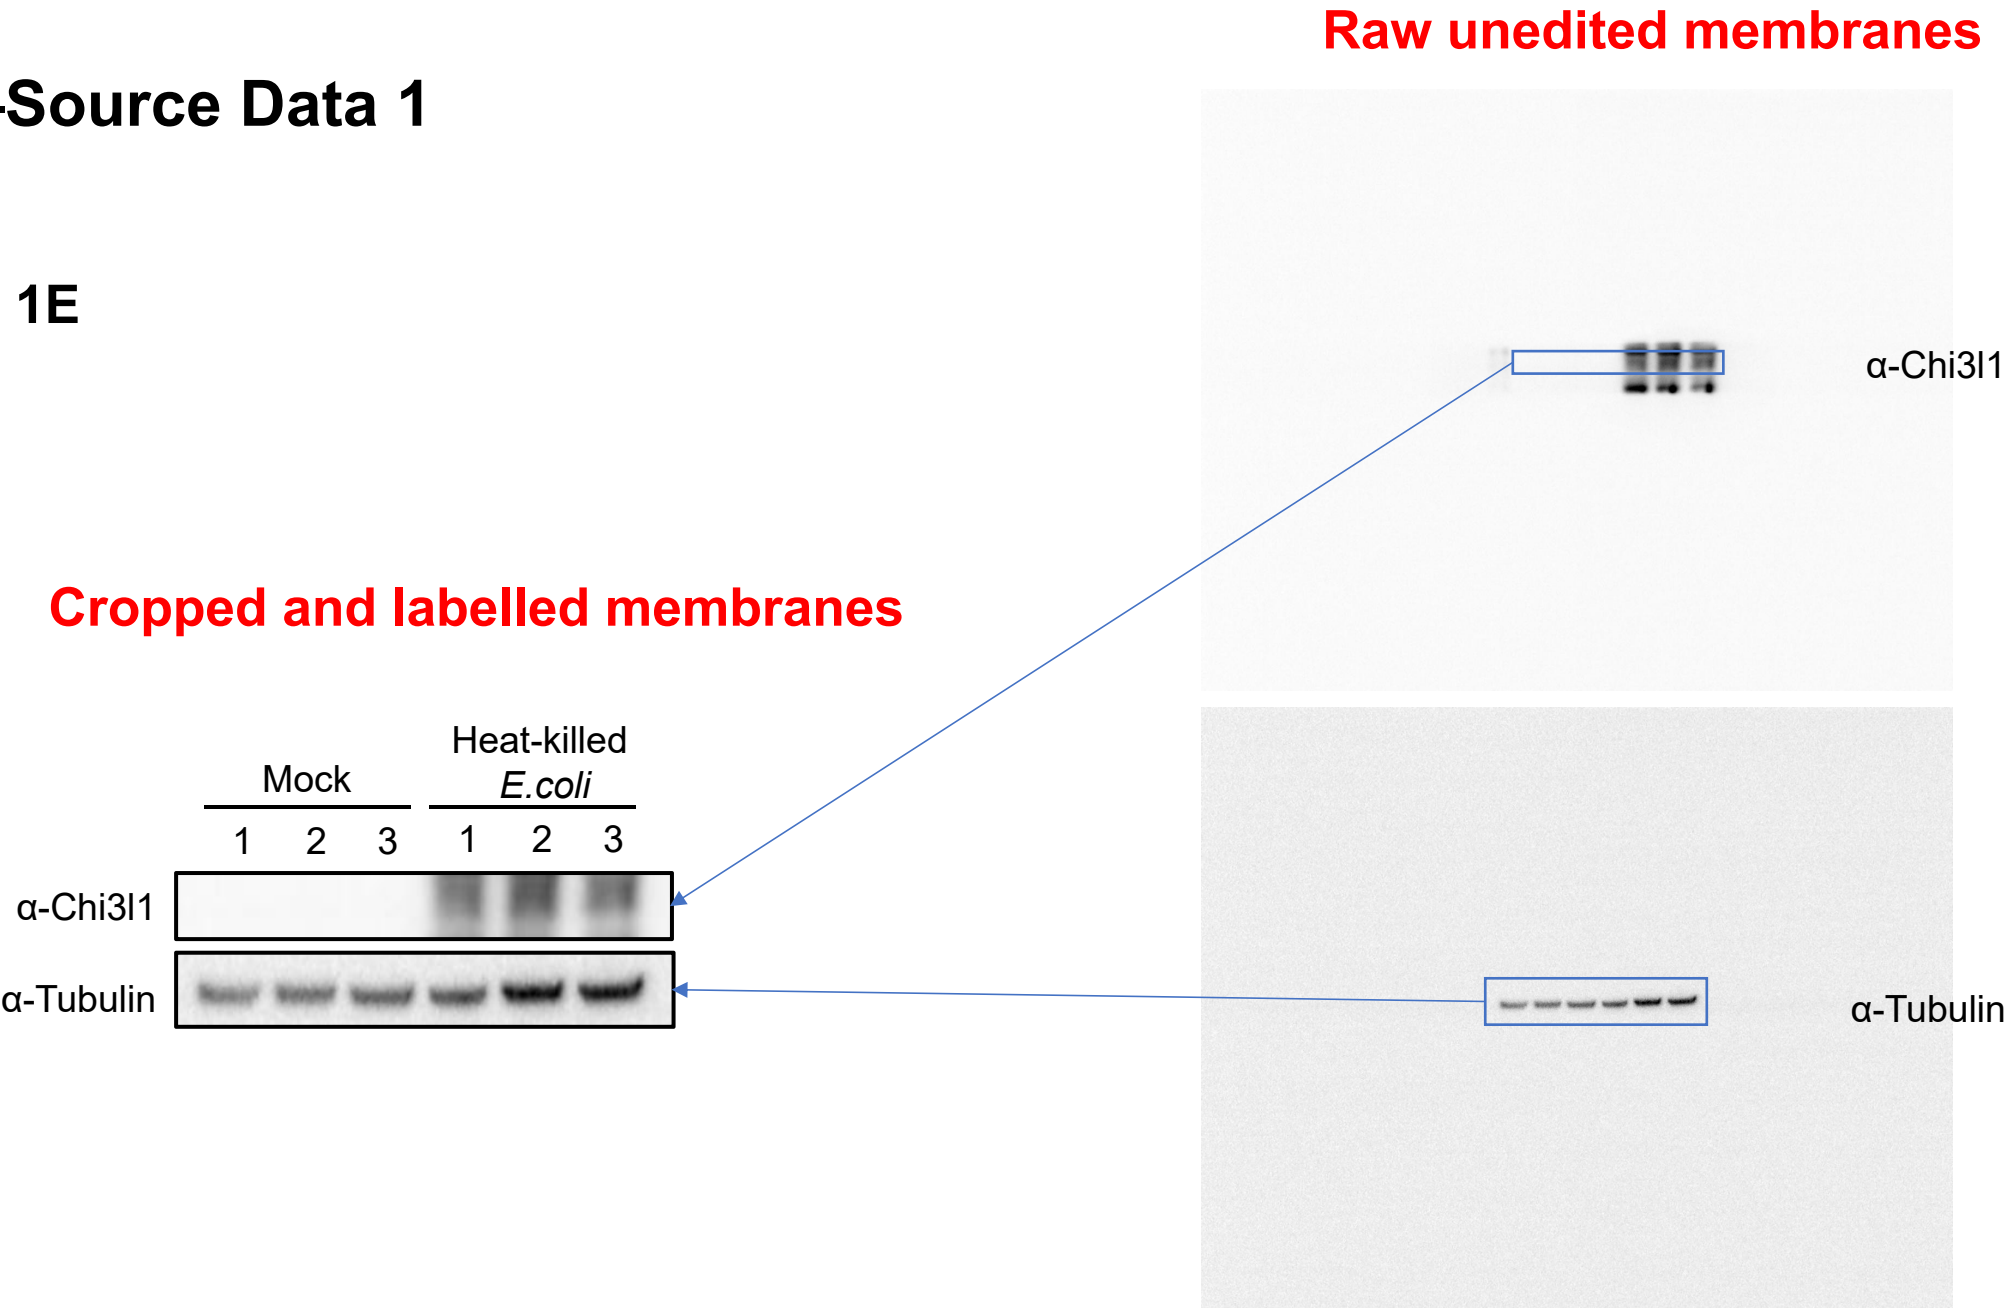

# Figure 1—Source Data 1

Figure 1F

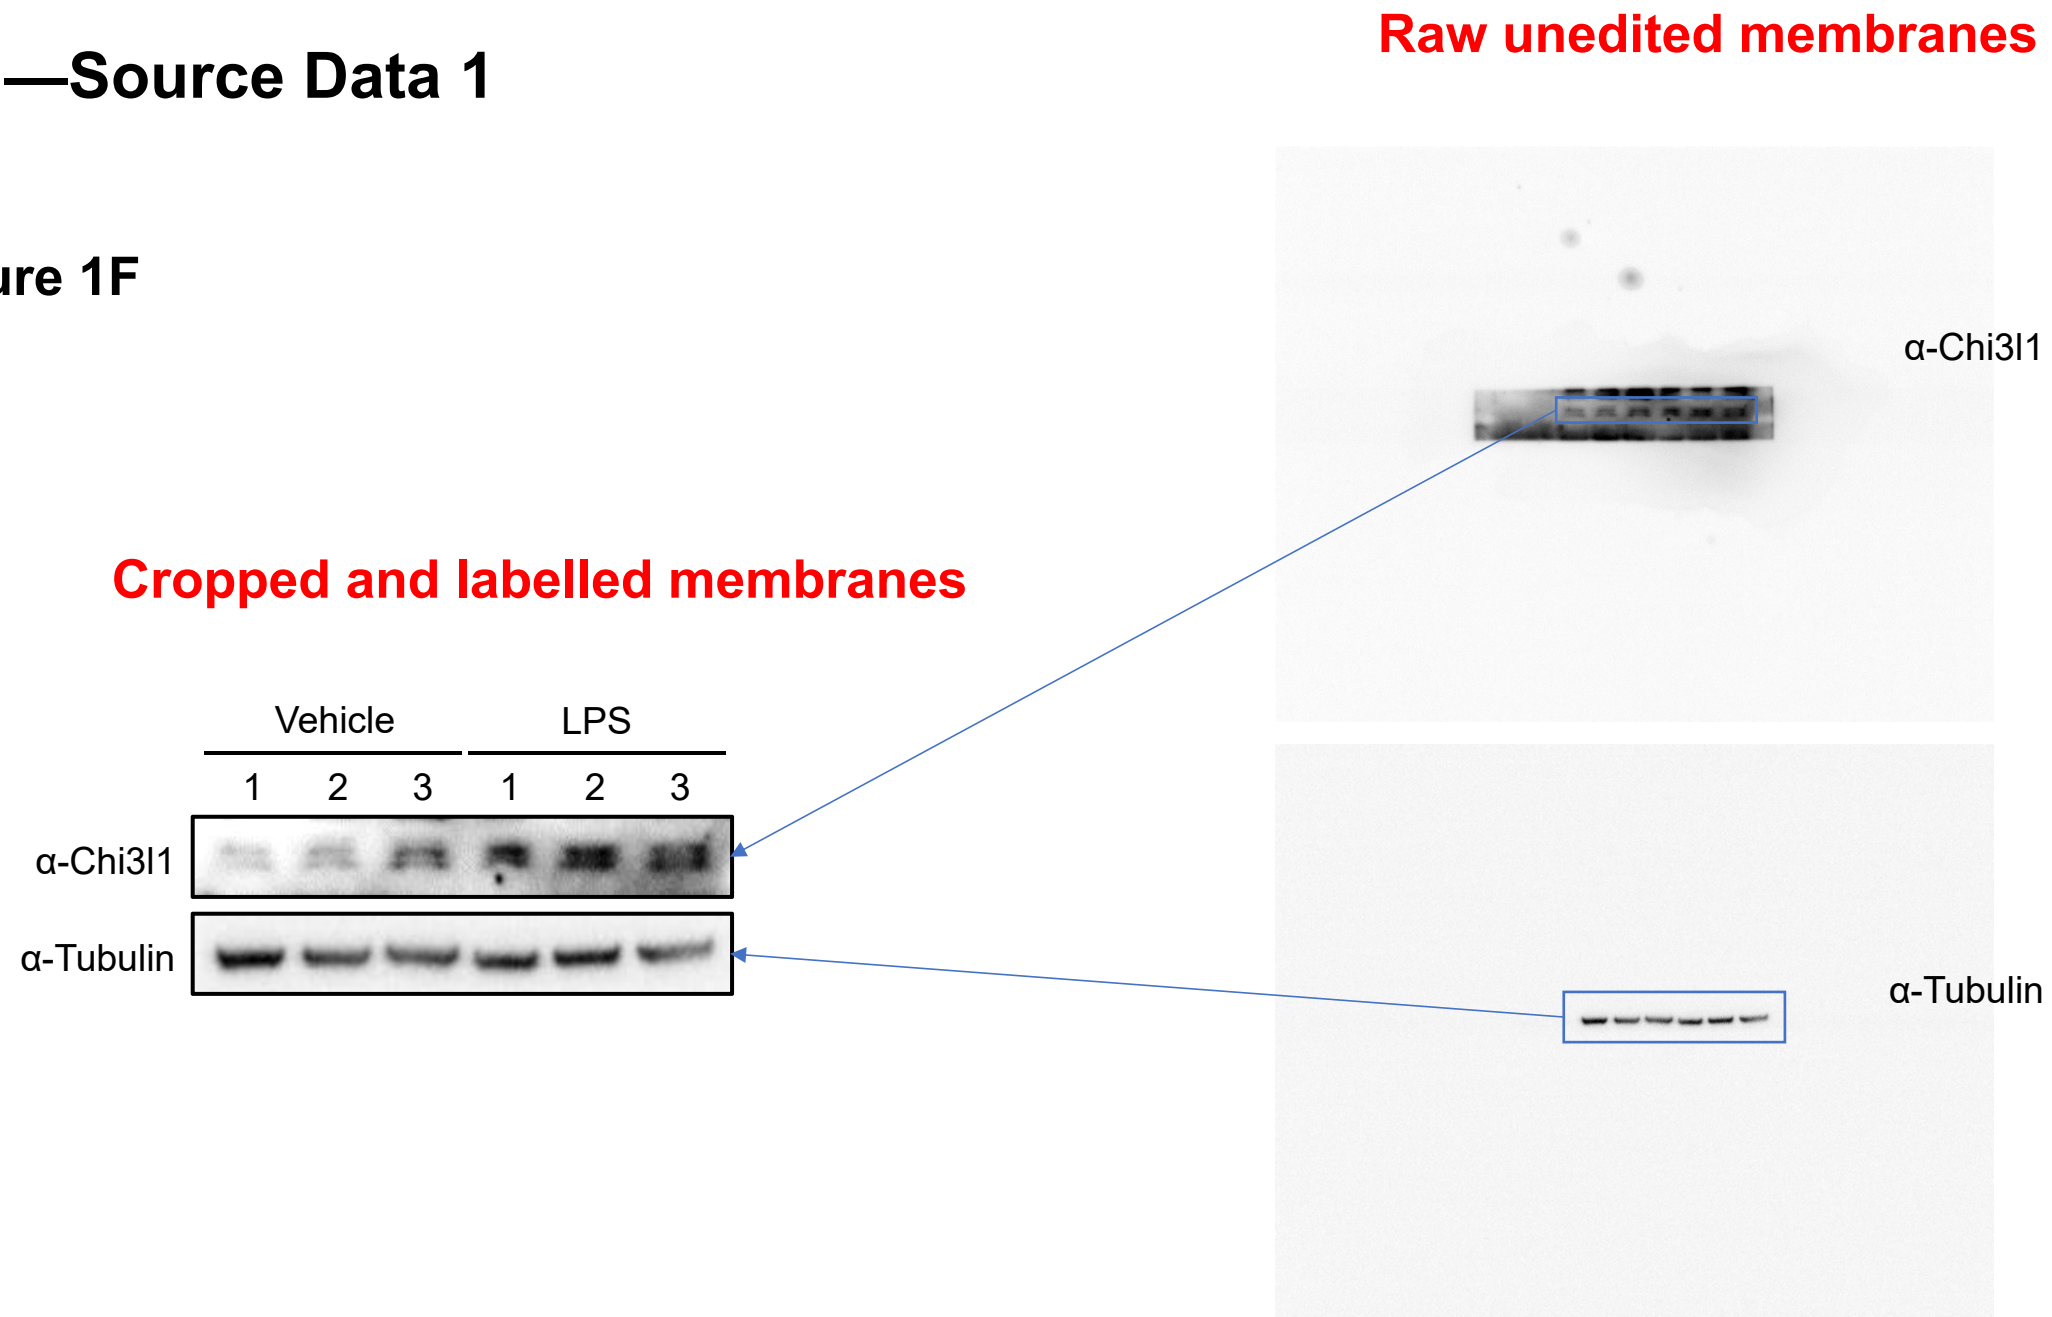

Supplement: fig1-data1 [file elife-92994-fig1-data1-v1.zip]
