# Supplementary material for: Peptidoglycan-Chi3l1 interaction shapes gut microbiota in intestinal mucus layer
Source: eLife journal article supplement (doi:10.7554/elife.92994), 2024-02-02
Supplement: fig1-figsupp1-data1 [file elife-92994-fig1-figsupp1-data1-v1.zip]

**Figure 1—figure supplement 1B.**

The figure displays two gel electrophoresis images, PCR① and PCR②, used to verify the expression of the Chl1-reporter and GFP.

**PCR① (Top Gel):** This gel shows the results of a PCR reaction targeting the Chl1-reporter. The lanes are labeled as follows: bp (molecular weight markers), M (DNA ladder), Chl1-reporter (indicated by a red underline), P (primers), Wt (wild-type), and Neg (negative control). The molecular weight markers are indicated on the left at 750 bp and 500 bp. The Chl1-reporter lane shows a single band at approximately 500 bp, which is also present in the Wt lane. The P, Neg, and Wt lanes show no bands. A red arrow on the right points to the band in the Chl1-reporter lane, labeled "GFP".

**PCR② (Bottom Gel):** This gel shows the results of a PCR reaction targeting the GFP gene. The lanes are labeled as follows: bp (molecular weight markers), M (DNA ladder), Chl1-reporter (indicated by a red underline), P (primers), Wt (wild-type), and Neg (negative control). The molecular weight markers are indicated on the left at 750 bp and 500 bp. The Chl1-reporter lane shows a single band at approximately 500 bp, which is also present in the Wt lane. The P, Neg, and Wt lanes show no bands. A red arrow on the right points to the band in the Chl1-reporter lane, labeled "GFP". Another red arrow on the right points to the band in the Wt lane, labeled "Wt".
