# Supplementary material for: Peptidoglycan-Chi3l1 interaction shapes gut microbiota in intestinal mucus layer
Source: eLife journal article supplement (doi:10.7554/elife.92994), 2024-02-02

# Figure 2—Source Data 1

Raw unedited membranes

Figure 2B

Cropped and labelled membranes

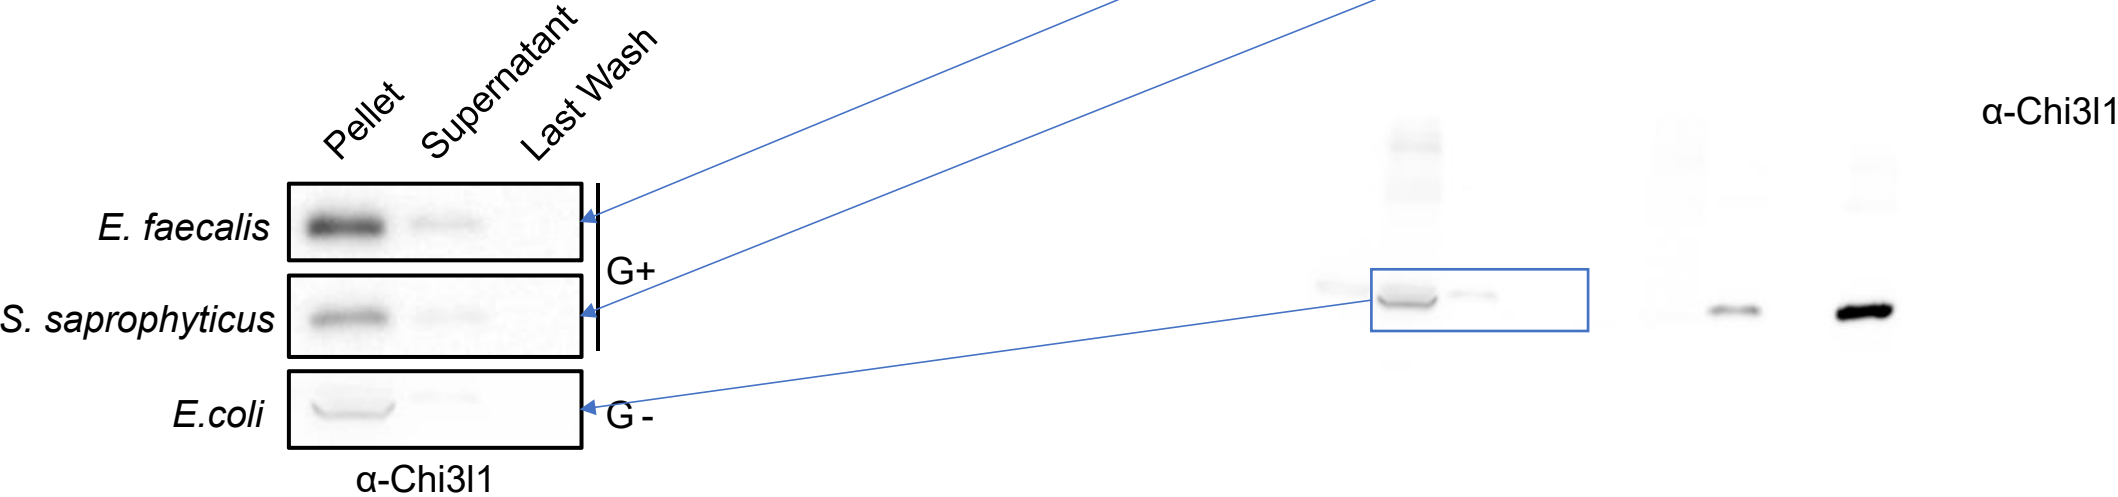

# Figure 2—Source Data 1

Figure 2C

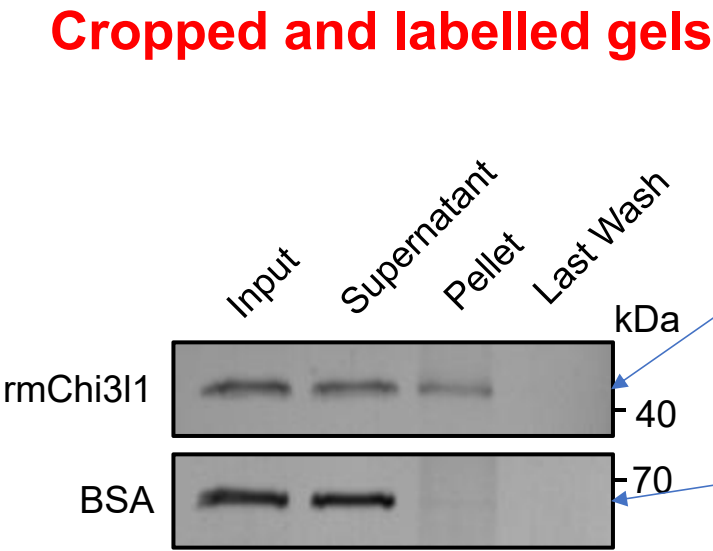

**Raw unedited gels**

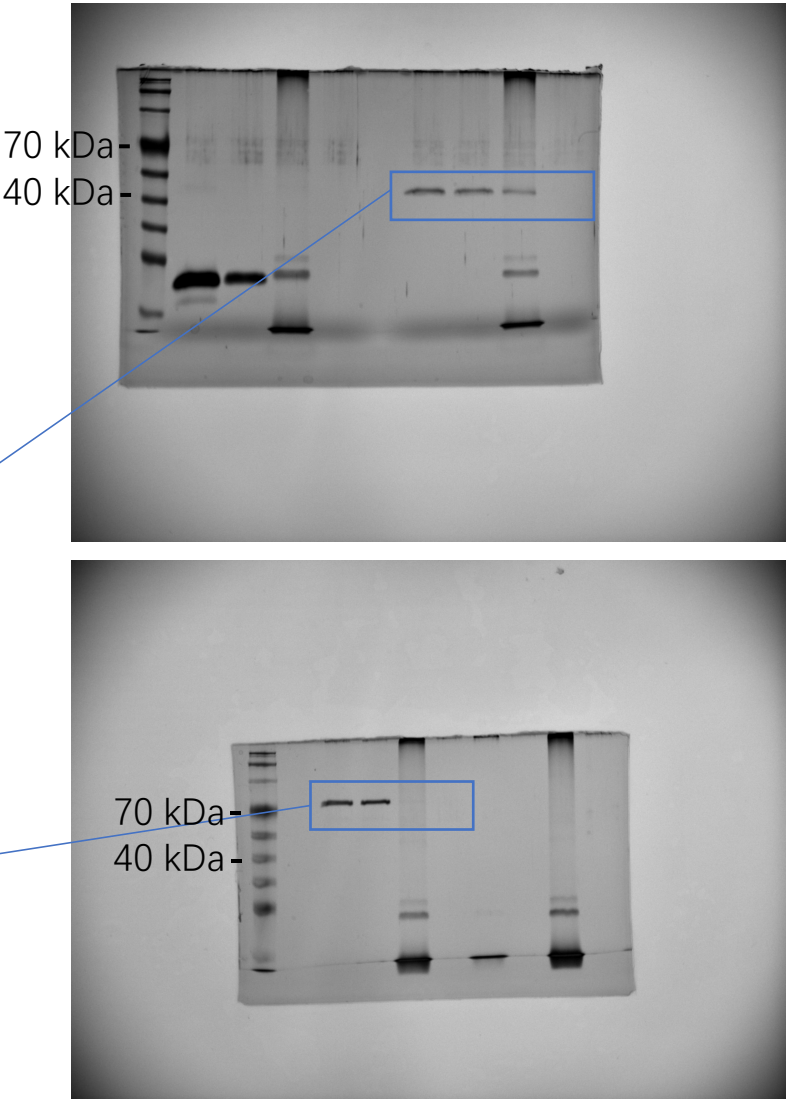

# Figure 2—Source Data 1

Figure 2D

Cropped and labelled gels

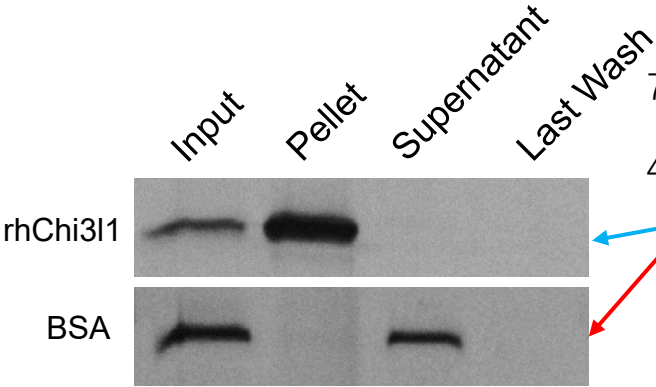

Raw unedited gels

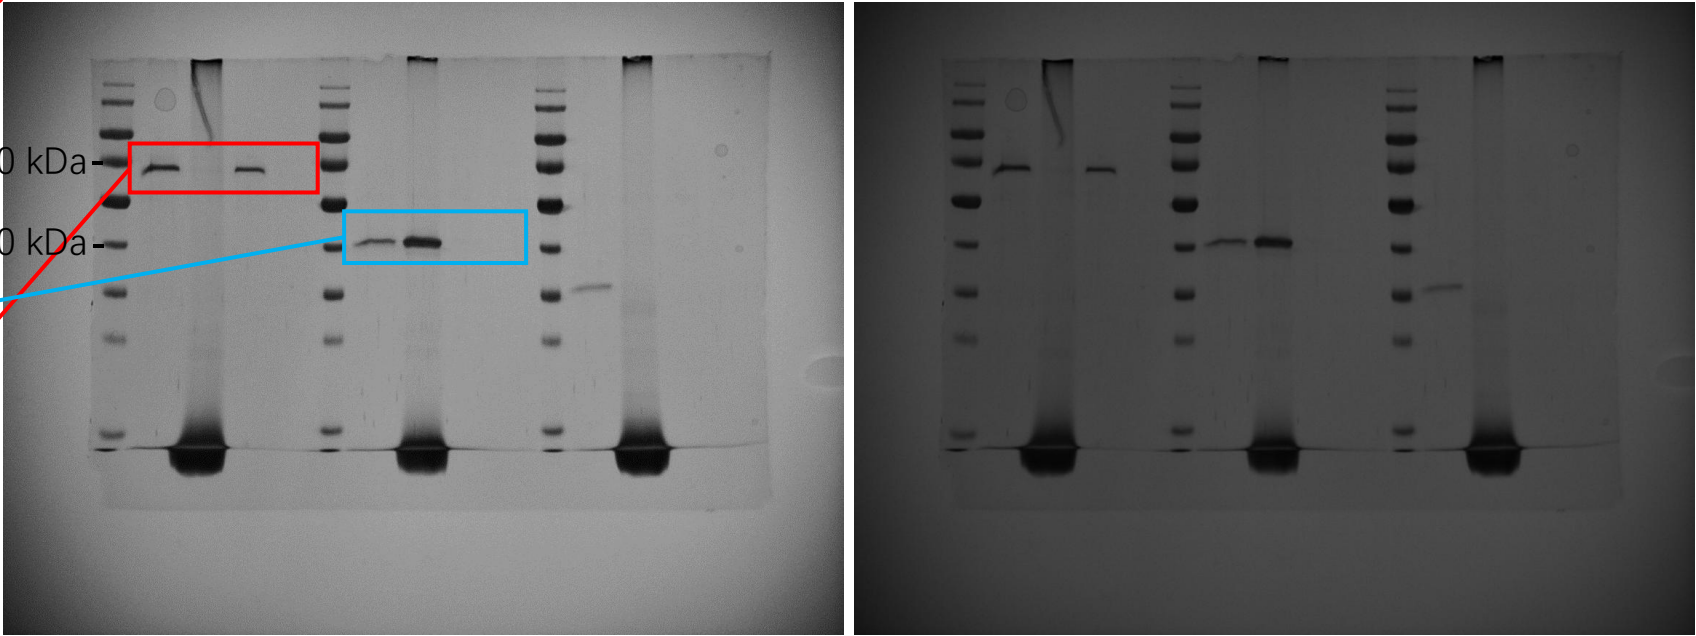

# Figure 2—Source Data 1

Figure 2E

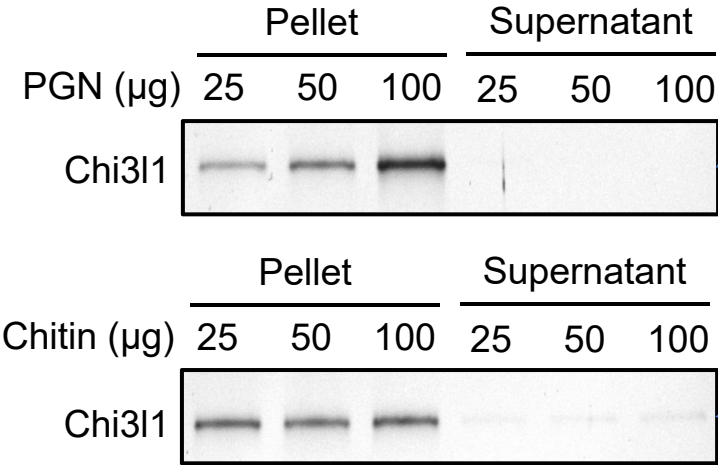

**Raw unedited gels**

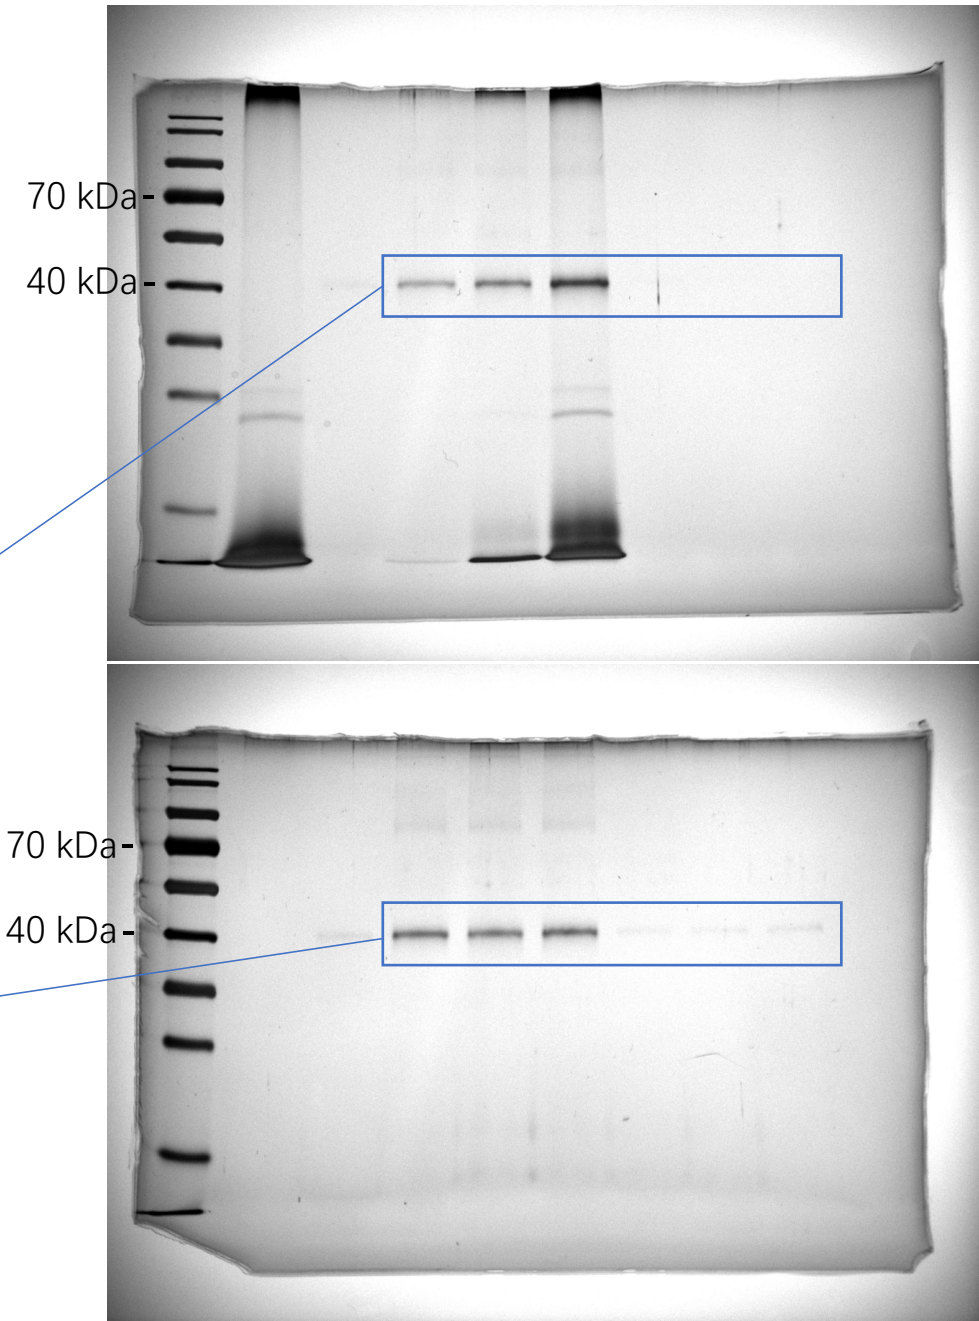

Supplement: fig2-data1 [file elife-92994-fig2-data1-v1.zip]
