# Supplementary material for: Peptidoglycan-Chi3l1 interaction shapes gut microbiota in intestinal mucus layer
Source: eLife journal article supplement (doi:10.7554/elife.92994), 2024-02-02

Figure 3—Source Data 2

Figure 3—figure supplement 1A.

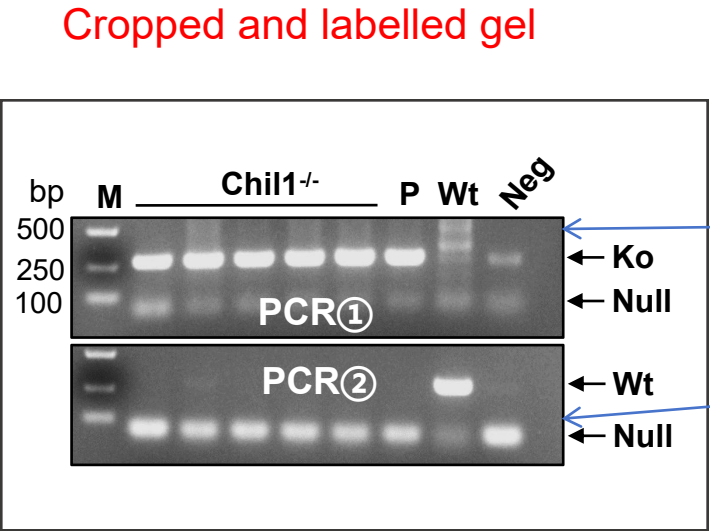

Raw unedited gel

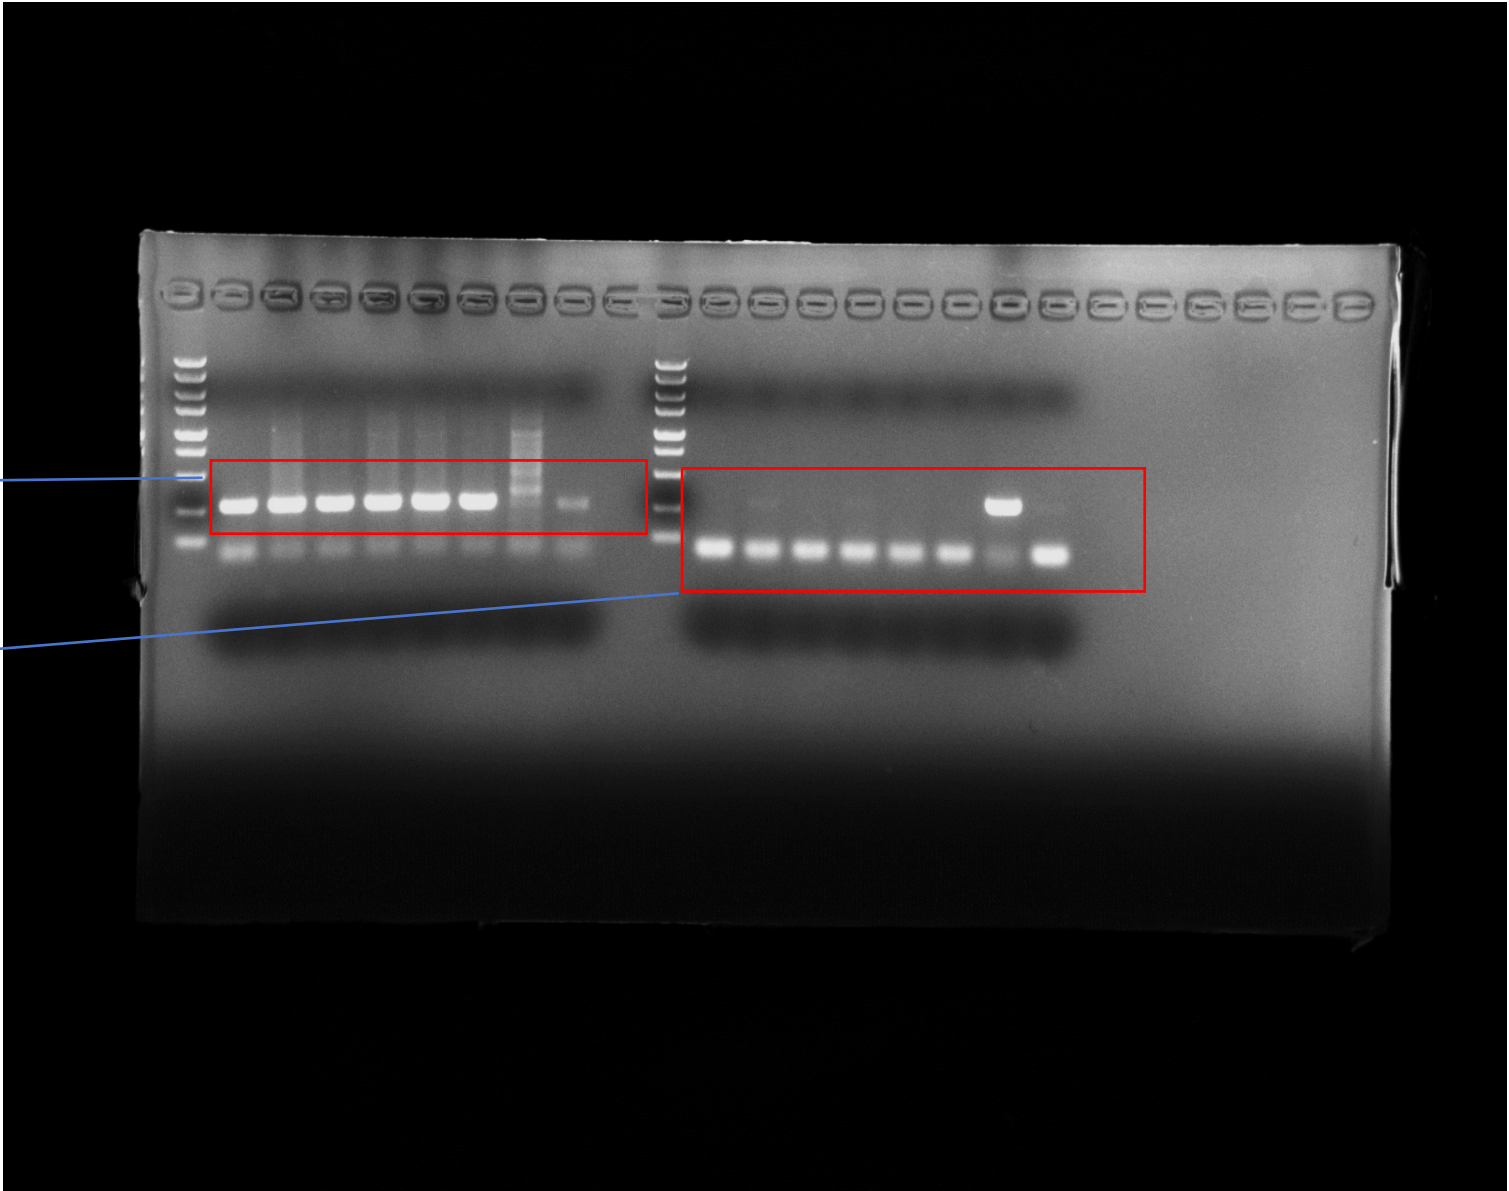

Figure 3—Source Data 2

Raw unedited gel

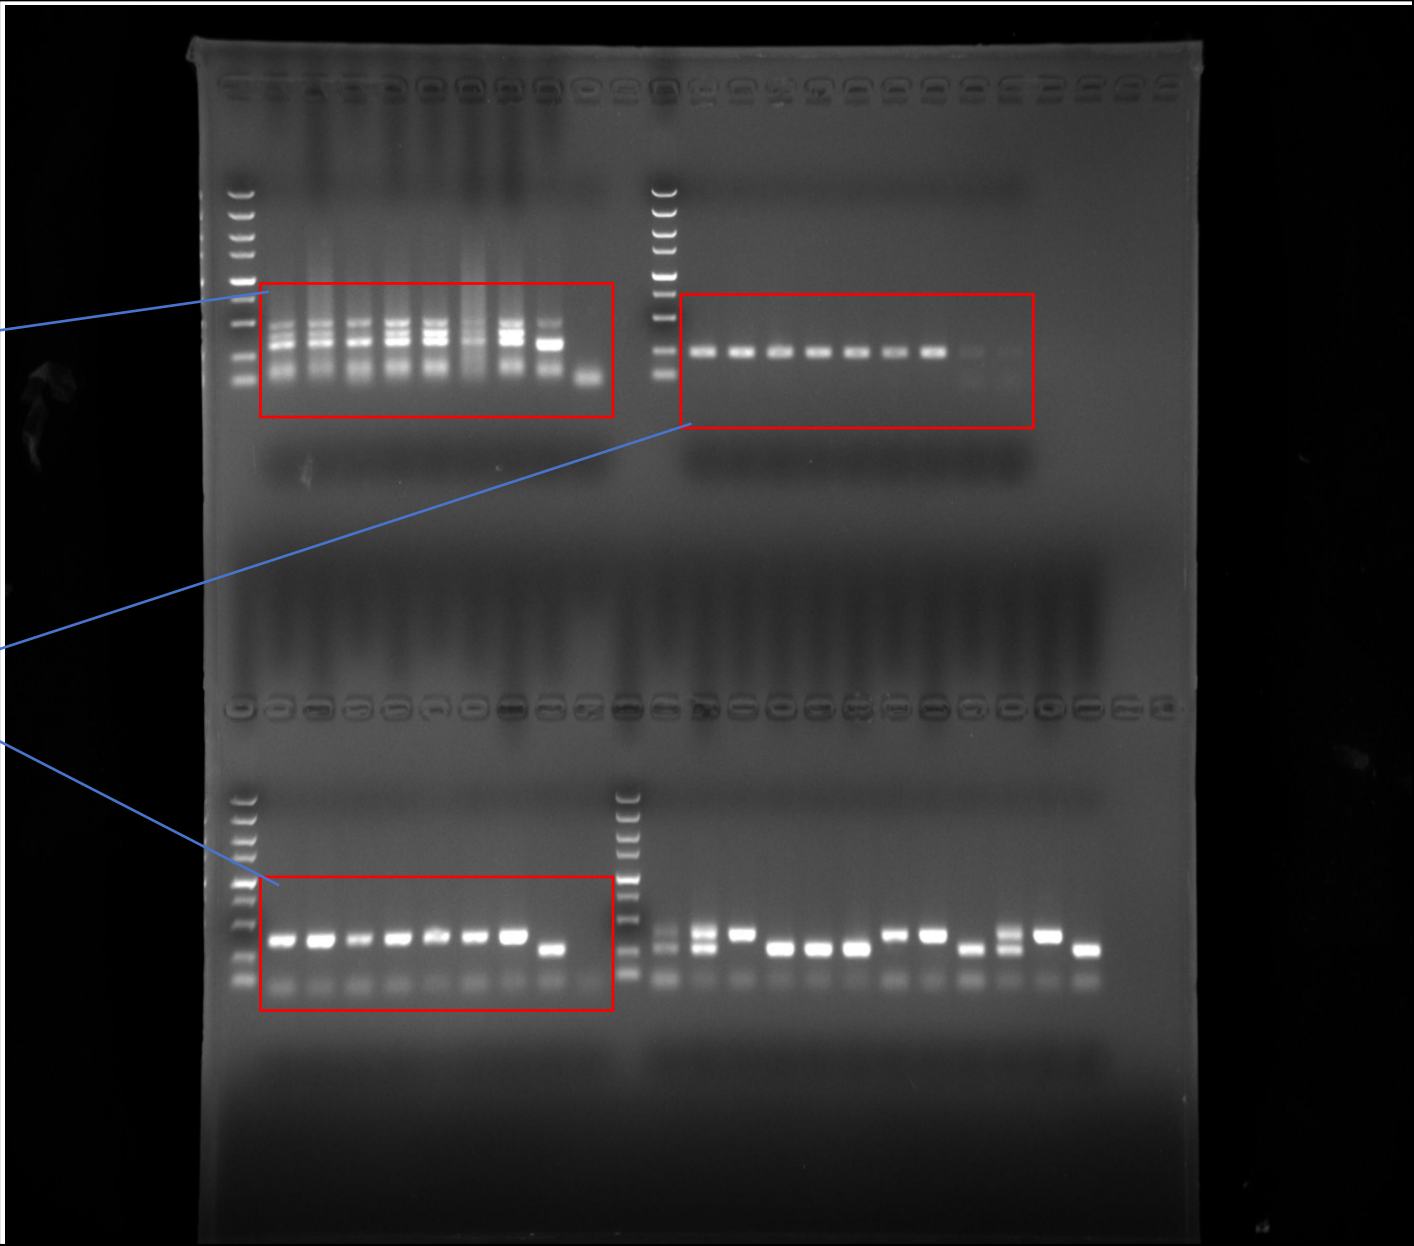

Figure 3—figure supplement 1B.

Cropped and labelled gel

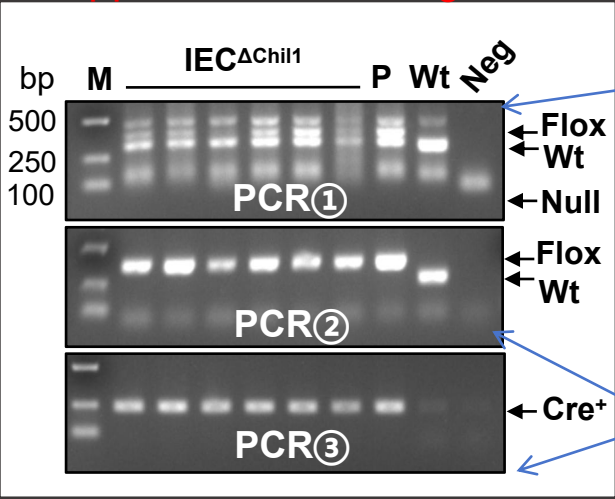

Supplement: fig3-figsupp1-data1 [file elife-92994-fig3-figsupp1-data1-v1.zip]
