# Supplementary material for: Peptidoglycan-Chi3l1 interaction shapes gut microbiota in intestinal mucus layer
Source: eLife. 2024 Oct 7;13:RP92994. doi: 10.7554/eLife.92994 (PMC11458176; doi:10.7554/eLife.92994)
Supplement: Figure 1—source data 3. [file elife-92994-fig1-data3.xlsx]

## Sheet: Figure 1A
number of Chi3l1 positive cells(field of view)
GF	ileum	0	0	0	0	0	0	0	0	0	0	0
	colon	0	0	0	0	0
SPF	ileum	3	5	5	14	8	12	8	11	4	4	5
	colon	19	12	5	7	15	10	6	9	8	11	13	6	7	18	12
