# Supplementary material for: Peptidoglycan-Chi3l1 interaction shapes gut microbiota in intestinal mucus layer
Source: eLife. 2024 Oct 7;13:RP92994. doi: 10.7554/eLife.92994 (PMC11458176; doi:10.7554/eLife.92994)
Supplement: Figure 2—source data 3. [file elife-92994-fig2-data3.xlsx]

## Sheet: Figure 2F
Bacteria	K12				GlmM
LB counting Dilution times	1000				100
Replicates	R1	R2	R3		R1	R2	R3
LB plated counts	120	131	167		83	92	133
	127	119	184		80	105	134
	125	118	164		70	110	140
Average	124	122.667	171.667		77.6667	102.333	135.667	GlmM average
Dilution times normalization	1240	1226.67	1716.67		77.6667	102.333	135.667	105.222
Normalized to GlmM average data	11.7848	11.6581	16.315		0.738136	0.972565	1.28936
Unpaired t test
P value	0.0014	Mean of column A	13.25
P value summary	**	Mean of column B	1
Significantly different (P < 0.05)?	Yes	Difference between means (B - A) ± SEM	-12.25 ± 1.540
One- or two-tailed P value?	Two-tailed	95% confidence interval	-16.53 to -7.977
t, df	t=7.957, df=4	R squared (eta squared)	0.9406

## Sheet: Figure 2G
Treatment	Mock	shCK	shChil1
LB plated counts	200	221	138
	211	219	126
	212	227	141
average	207.667	222.333	135
normalized to Mock	1	1.105	0.69
	1.055	1.095	0.63
	1.06	1.135	0.705
Dunnett's multiple comparisons test	Mean Diff.	95.00% CI of diff.	Significant?	Summary	Adjusted P Value
shCK vs. NC	0.07333	-0.002014 to 0.1487	No	ns	0.0552
shCK vs. shRNA1	0.4367	0.3613 to 0.5120	Yes	****	<0.0001
