# Supplementary material for: Peptidoglycan-Chi3l1 interaction shapes gut microbiota in intestinal mucus layer
Source: eLife. 2024 Oct 7;13:RP92994. doi: 10.7554/eLife.92994 (PMC11458176; doi:10.7554/eLife.92994)
Supplement: Figure 3—figure supplement 2—source data 1. [file elife-92994-fig3-figsupp2-data1.xlsx]

## Sheet: Figure3—figure supplement 2
Raw data		Sort out data
Sample Name	CT	Ct Mean	pg/ul	pg	pg/mg
Villen-cre1 turi	26.4137	26.4816	0.000217843	0.0108922	7.92158e-05
Villen-cre1 turi	25.651
Villen-cre1 turi	26.5494
Villen-cre2 turi	21.8576	23.181	0.0018837	0.0941849	0.00077391
Villen-cre2 turi	24.5044
Villen-cre2 turi	Undetermined
Villen-cre3 turi	26.5061	26.5628	0.000206577	0.0103288	0.000118314
Villen-cre3 turi	26.9154
Villen-cre3 turi	26.6195
IECΔChil11 turi	20.3357
IECΔChil11 turi	19.9452	20.0182	0.0148865	0.744325	0.00560064
IECΔChil11 turi	20.0912
IECΔChil12 turi	36.6457
IECΔChil12 turi	21.951	21.0245	0.00771174	0.385587	0.00238606
IECΔChil12 turi	20.0979
IECΔChil13 turi	18.3249
IECΔChil13 turi	17.7688	17.7724	0.0646047	3.23024	0.0256572
IECΔChil13 turi	17.776
h2o	Undetermined
h2o	Undetermined
h2o	Undetermined
