# Supplementary material for: Peptidoglycan-Chi3l1 interaction shapes gut microbiota in intestinal mucus layer
Source: eLife. 2024 Oct 7;13:RP92994. doi: 10.7554/eLife.92994 (PMC11458176; doi:10.7554/eLife.92994)
Supplement: Figure 3—source data 1. [file elife-92994-fig3-data1.xlsx]

## Sheet: Figure3A
Sample ID	Chao1
Villin-cre1	484.158
Villin-cre2	481.677
Villin-cre3	464.333
Villin-cre4	461.488
Villin-cre5	488.243
Villin-cre6	465.25
Villin-cre7	491.077
Villin-cre8	480.116
Villin-cre9	511.429
Villin-cre10	473.897
IECΔChil11	473.75
IECΔChil12	432.098
IECΔChil13	445.103
IECΔChil14	426.636
IECΔChil15	466.571
IECΔChil16	493.344
IECΔChil17	463.193

## Sheet: Figure3B
Raw data		Sort out data							Raw data		Sort out data
			（feces）						Sample Name	CT	CT mean	（gut contents）
Sample Name	CT	CT mean(red)	sample	CT mean	pg/µL(from standard curve)	pg	pg/mg feces		Villin-cre1 ileum contens	6.10836		Sample	CT mean	pg/ul	pg	pg/mg
Villin-cre1	8.28371		Villin-cre1	7.75289	45.1155	2255.77	25.053		Villin-cre1 ileum contens	5.68613	5.64715	Villin-cre1	5.64715	178.666	8933.32	114.677	ileum contents
Villin-cre1	7.75326	7.75289	Villin-cre2	6.58991	96.4805	4824.03	58.1909		Villin-cre1 ileum contens	5.60818		Villin-cre2	5.39254	211.016	10550.8	117.886
Villin-cre1	7.75252		Villin-cre3	6.46625	104.602	5230.12	111.755		Villin-cre2 ileum contens	5.4576	5.39254	Villin-cre3	10.2625	8.74908	437.454	9.67818
Villin-cre2	6.50392	6.58991	Villin-cre4	6.6957	90.0345	4501.72	42.5494		Villin-cre2 ileum contens	5.32748		Villin-cre4	6.35713	112.335	5616.75	204.245
Villin-cre2	6.67589		Villin-cre5	6.96449	75.5289	3776.44	75.0784		Villin-cre2 ileum contens	5.80673		Villin-cre5	6.39038	109.92	5495.99	103.503
Villin-cre2	6.27368		Villin-cre6	8.3543	30.4518	1522.59	61.6434		Villin-cre3 ileum contens	10.3881	10.2625	Villin-cre6	6.53246	100.172	5008.59	110.809
Villin-cre3	6.27318		Villin-cre7	8.51957	27.3337	1366.69	19.6081		Villin-cre3 ileum contens	10.1369		IECΔChil11	7.61975	49.2171	2460.85	23.0849
Villin-cre3	6.44957	6.46625	Villin-cre8	6.36718	111.599	5579.97	48.4793		Villin-cre3 ileum contens	10.6707		IECΔChil12	8.48729	27.9167	1395.83	13.4215
Villin-cre3	6.48292		Villin-cre9	7.15688	66.6044	3330.22	32.81		Villin-cre4 ileum contens	6.66472		IECΔChil13	8.98043	20.2247	1011.24	17.8664
Villin-cre4	6.64657	6.6957	Villin-cre10	7.96547	39.263	1963.15	45.2339		Villin-cre4 ileum contens	6.29542	6.35713	IECΔChil14	9.4229	15.1456	757.28	8.47069
Villin-cre4	6.41673		IECΔChil11	7.96957	39.158	1957.9	24.6276		Villin-cre4 ileum contens	6.41884		IECΔChil15	7.57209	50.7745	2538.73	40.3613
Villin-cre4	6.74484		IECΔChil12	8.52143	27.3006	1365.03	16.0971		Villin-cre5 ileum contens	6.18782		Villin-cre1	5.6589	177.3	8864.98	157.46	colon contents
Villin-cre5	6.78117		IECΔChil13	8.29567	31.6414	1582.07	18.3748		Villin-cre5 ileum contens	6.35916	6.39038	Villin-cre2	5.79164	162.566	8128.28	135.698
Villin-cre5	6.95725	6.96449	IECΔChil14	7.77893	44.3541	2217.7	43.3145		Villin-cre5 ileum contens	6.4216		Villin-cre3	5.733	168.918	8445.88	143.393
Villin-cre5	6.97174		IECΔChil15	8.23074	33.013	1650.65	14.8306		Villin-cre6 ileum contens	6.73906		Villin-cre4	4.54342	367.571	18378.6	223.041
Villin-cre6	8.343	8.3543	IECΔChil16	9.38673	15.5079	775.396	10.7544		Villin-cre6 ileum contens	6.47335	6.53246	Villin-cre5	5.18467	241.724	12086.2	201.773
Villin-cre6	8.3656		IECΔChil17	7.84424	42.5004	2125.02	15.0284		Villin-cre6 ileum contens	6.59158		Villin-cre6	4.93886	283.853	14192.7	256.649
Villin-cre6	8.41402		IECΔChil18	6.65896	92.2232	4611.16	67.4146		IECΔChil11 ileum contents	7.66859	7.61975	IECΔChil11	5.57661	187.098	9354.88	254.209
Villin-cre7	8.30142		IECΔChil19	8.21025	33.458	1672.9	21.7826		IECΔChil11 ileum contents	7.57092		IECΔChil12	6.18543	125.676	6283.8	77.6737
Villin-cre7	8.47187	8.51957	IECΔChil110	8.77164	23.1819	1159.09	18.8778		IECΔChil11 ileum contents	7.77991		IECΔChil13	5.19379	240.288	12014.4	214.543
Villin-cre7	8.56728								IECΔChil12 ileum contents	8.73087	8.48729	IECΔChil14	5.94573	146.991	7349.57	128.041
Villin-cre8	6.37286	6.36718							IECΔChil12 ileum contents	9.65401		IECΔChil15	5.53243	192.578	9628.89	126.198
Villin-cre8	6.3615								IECΔChil12 ileum contents	8.2437
Villin-cre8	6.44808								IECΔChil13 ileum contents	8.77404	8.98043
Villin-cre9	7.13255	7.15688							IECΔChil13 ileum contents	9.18683
Villin-cre9	7.3284								IECΔChil13 ileum contents	9.66485
Villin-cre9	7.18122								IECΔChil14 ileum contents	9.57397
Villin-cre10	8.07854								IECΔChil14 ileum contents	9.45029
Villin-cre10	7.98799	7.96547							IECΔChil14 ileum contents	9.39552	9.4229
Villin-cre10	7.94294								IECΔChil15 ileum contents	7.59892	7.57209
IECΔChil11	7.9706	7.96957							IECΔChil15 ileum contents	7.54526
IECΔChil11	7.96853								IECΔChil15 ileum contents	7.47947
IECΔChil11	7.93292								Villin-cre1 colon contens	5.94871
IECΔChil12	8.37667								Villin-cre1 colon contens	5.63996	5.6589
IECΔChil12	8.52813	8.52143							Villin-cre1 colon contens	5.67785
IECΔChil12	8.51473								Villin-cre2 colon contens	5.28222
IECΔChil13	8.12886								Villin-cre2 colon contens	5.88467	5.79164
IECΔChil13	8.28954	8.29567							Villin-cre2 colon contens	5.69862
IECΔChil13	8.30179								Villin-cre3 colon contens	4.76308
IECΔChil14	7.77988	7.77893							Villin-cre3 colon contens	5.85462	5.733
IECΔChil14	7.77797								Villin-cre3 colon contens	5.61139
IECΔChil14	7.73319								Villin-cre4 colon contens	4.8711
IECΔChil15	8.29784	8.23074							Villin-cre4 colon contens	4.57086	4.54342
IECΔChil15	9.14003								Villin-cre4 colon contens	4.51597
IECΔChil15	8.16364								Villin-cre5 colon contens	4.90569	5.18467
IECΔChil16	8.72875								Villin-cre5 colon contens	5.46365
IECΔChil16	9.34573	9.38673							Villin-cre5 colon contens	6.30184
IECΔChil16	9.42774								Villin-cre6 colon contens	4.95589	4.93886
IECΔChil17	7.52336								Villin-cre6 colon contens	4.92182
IECΔChil17	7.75669	7.84424							Villin-cre6 colon contens	4.82578
IECΔChil17	7.9318								IECΔChil11 colon contents	5.527
IECΔChil18	6.95766								IECΔChil11 colon contents	5.49521	5.57661
IECΔChil18	6.55811	6.65896							IECΔChil11 colon contents	5.658
IECΔChil18	6.75981								IECΔChil12 colon contents	6.96643
IECΔChil19	8.20801	8.21025							IECΔChil12 colon contents	6.124	6.18543
IECΔChil19	8.18044								IECΔChil12 colon contents	6.24686
IECΔChil19	8.21249								IECΔChil13 colon contents	6.03589
IECΔChil110	8.65292	8.77164							IECΔChil13 colon contents	5.03072	5.19379
IECΔChil110	8.89036								IECΔChil13 colon contents	5.35685
IECΔChil110	9.32813								IECΔChil14 colon contents	5.91326	5.94573
H2O	25.512								IECΔChil14 colon contents	5.97819
H2O	29.7542								IECΔChil14 colon contents	5.67927
H2O	29.7348								IECΔChil15 colon contents	5.53372	5.53243
									IECΔChil15 colon contents	5.53114
									IECΔChil15 colon contents	5.45216
									h20	28.071
									h20	25.5471
									h20	28.4854

## Sheet: Figure3C
sample	group	PC1	PC2	PC3	PC4	PC5	PC6	PC7	PC8	PC9	PC10	PC11	PC12	PC13	PC14	PC15	PC16	PC17	PC18	PC19	PC20
IECΔChil11	KO	0.0388	-0.0262	0.0035	-0.0048	0.0483	-0.0095	0.022	-0.0601	-0.0921	0.0345	-0.0097	-0.0498	0.0107	-0.0526	-0.0152	0.0115	-0.0034	0.0016	0.009	0
IECΔChil110	KO	0.0553	-0.0342	-0.011	-0.0005	-0.0258	0.0633	-0.0313	-0.0142	-0.0351	-0.0558	0.0202	0.0351	0.0313	0.0183	-0.0724	-0.0069	0.0063	-0.0072	0.0043	0
IECΔChil12	KO	0.1067	-0.0357	0.0124	-0.0237	0.0398	0.0084	0.0113	0.0136	-0.0113	-0.0441	-0.0401	-0.0251	0.0009	0.0347	0.0365	-0.0352	0.0207	0.0205	0.0234	0
IECΔChil13	KO	0.0866	-0.0447	-0.0126	-0.0088	0.0447	0.0101	0.0783	-0.0397	0.0054	0.0301	-0.0003	0.0814	0.0108	-0.0099	0.0221	-0.0131	0.0203	-0.0057	-0.0175	0
IECΔChil14	KO	0.1141	-0.0236	0.0498	-0.0458	-0.0224	-0.0418	0.0137	-0.008	-0.0453	-0.0049	0.0311	-0.0192	-0.0439	0.0612	0.0124	0.0282	-0.0115	-0.0175	-0.015	0
IECΔChil15	KO	-0.1515	-0.0796	-0.0489	-0.1144	0.0937	-0.0742	-0.0266	0.008	0.0338	-0.0021	0.0367	0.0169	-0.0068	0.0003	-0.013	0.0045	-0.008	0.0023	0.0119	0
IECΔChil16	KO	-0.0869	-0.0373	-0.0729	-0.0793	-0.1143	0.0228	0.1031	0.0183	0.0314	-0.0005	-0.0221	-0.0341	0.0071	-0.0048	-0.0124	0.0059	0.0031	-0.0028	0.001	0
IECΔChil17	KO	-0.1428	-0.1085	-0.0161	0.0663	-0.0001	0.0743	-0.0484	-0.0561	0.0196	-0.0144	0.0007	-0.0187	0.0287	0.0109	0.0461	0.0206	-0.0042	-0.0123	-0.0046	0
IECΔChil18	KO	0.0566	-0.0323	-0.016	0.0406	-0.0228	0.0533	-0.0058	0.0843	-0.0122	0.0703	0.0757	-0.0017	0.0106	0.0021	0.012	-0.0119	-0.0092	0.0109	0.0106	0
IECΔChil19	KO	0.0622	-0.0657	-0.0234	-0.0284	-0.0076	0.0406	-0.0758	0.0124	0.0213	0.0252	-0.0499	-0.0097	-0.0669	-0.021	-0.0176	-0.0221	-0.005	0.0078	-0.0203	0
Villin-cre 1	WT	-0.0579	0.1876	-0.041	-0.0326	0.091	0.0807	0.016	-0.0064	0.0144	-0.0014	0.018	-0.0324	-0.0021	0.0166	-0.0049	-0.0051	0.0024	-0.0007	-0.0131	0
Villin-cre 10	WT	-0.0428	0.015	0.0012	0.1137	-0.0099	-0.0602	0.0228	-0.065	0.0394	0.0426	-0.0127	-0.0067	-0.0028	0.0434	-0.0339	-0.0185	-0.0153	0.0179	0.0043	0
Villin-cre 2	WT	0.0622	0.0443	-0.0353	0.0389	-0.0068	-0.0486	-0.0202	0.0142	0.0248	0.0018	-0.006	-0.0124	0.0018	-0.0161	0.0052	-0.0284	0.0029	-0.059	0.0113	0
Villin-cre 3	WT	0.0774	0.0673	-0.0699	0.0258	0.0009	0.0167	-0.0155	0.014	0.0118	0.0119	-0.0443	0.0421	-0.0238	0.0017	0.0035	0.061	-0.0005	0.0037	0.0221	0
Villin-cre 4	WT	0.0755	0.03	-0.0229	-0.0018	-0.0316	-0.076	-0.0566	0.0115	0.0213	0.005	0.0113	-0.0252	0.0528	-0.0068	0	0.0187	0.043	0.0168	-0.0176	0
Villin-cre 5	WT	0.0979	0.0397	0.0078	-0.0301	-0.012	-0.0235	-0.0053	0.0109	0.0094	-0.0327	-0.0183	0.0132	0.0534	-0.0179	0.0185	-0.006	-0.06	0.011	-0.0093	0
Villin-cre 6	WT	0.0586	0.0101	0.1136	0.0351	-0.0134	0.0087	0.0266	-0.0265	0.0632	-0.051	0.0541	-0.0082	-0.043	-0.0463	-0.0003	0.009	0.0046	0.0095	0.0066	0
Villin-cre 7	WT	-0.129	0.0683	0.1734	-0.0812	-0.0546	0.0139	-0.0374	-0.0127	-0.0108	0.0426	-0.0234	0.0265	0.0134	0.0037	0.0067	-0.0066	0.0075	-0.0041	0.0091	0
Villin-cre 8	WT	-0.1642	0.0631	-0.0798	0.044	-0.0602	-0.0412	-0.0108	0	-0.0726	-0.0379	0.0176	0.0298	-0.038	-0.0148	0.0247	-0.0191	0.0035	0.0122	-0.0041	0
Villin-cre 9	WT	-0.1169	-0.0374	0.0879	0.0871	0.0632	-0.0176	0.0396	0.1015	-0.0166	-0.019	-0.0387	-0.0016	0.0057	-0.0027	-0.018	0.0136	0.0028	-0.0049	-0.0121	0
	Proportion of explained(%)
PC1	25.2861
PC2	11.5988
PC3	10.5239
PC4	8.645
PC5	6.7963
PC6	5.9214
PC7	4.8807
PC8	4.4373
PC9	3.7848
PC10	3.0301
PC11	2.9121
PC12	2.5524
PC13	2.5047
PC14	1.8961
PC15	1.7565
PC16	1.2884
PC17	0.9568
PC18	0.7704
PC19	0.4581
PC20	0

## Sheet: Figure3D
G+		IECΔChil1	Villin-cre
	Other	0.034769	0.0323068
	Firmicutes	0.378028	0.488366
G-		Bacteroidetes	Deferribacteres	Other	Proteobacteria	TM7
	IECΔChil1	0.344043	0.0964997	0.0121549	0.0910977	0.0434083
	Villin-cre	0.297226	0.0400852	0.00878217	0.0701317	0.0631027
		IECΔChil1	Villin-cre
	Gram_Positive	0.412797	0.520672
	Gram_Negative	0.587203	0.479328

## Sheet: Figure3E
LTA flurorsence intensity(field of view)
Villin-cre	IECΔChil1
3.613	8.454
11.325	5.851
12.92	6.37
14.801	5.702
14.916	3.51
13.438	6.043
10.386	9.392
7.955	5.982
6.053	12.302
5.282	14.25
4.43	16.147
12.597	14.27
12.503	8.876
9.896	8.295
10.143	6.504
10.425	8.879
10.974
14.054
10.804
13.315
14.31
11.8
10.501
9.605

## Sheet: Figure3F
Firmicutes flurorsence intensity(field of view)
Villin-cre	IECΔChil1
16.054	9.49
6.549	9.856
7.658	7.948
16.121	5.157
16.278	6.86
16.678	3.758
12.179	1.683
17.784	3.125
15.79	8.501
13.01	7.024
12.195	11.198
	10.758
	11.386
	8.632
	8.462

## Sheet: Figure3G
	this_column	f__Lachnospiraceae	f__Ruminococcaceae	Adlercreutzia	Allobaculum	Lactobacillus	Oscillospira	Other	Ruminococcus	Turicibacter	[Ruminococcus]
1	Villen-cre	0.0411774	0.0132752	0.0206593	0.0153162	0.0997348	0.0188632	0.0516692	0.0177542	0	0.0225396
2	IECΔChil1	0.03144	0.0129108	0	0.026487	0.0482402	0.0206055	0.0326809	0.0218004	0.0187264	0.0146576

## Sheet: Figure3H
	WT（n=3）			Chil1-/-(n=3)
	Type1-Mean(%)	Type1-Sd(%)		Type2-Mean(%)	Type2-Sd(%)
Lactobacillus	51.39	7.837		22.01	9.478
Romboutsia	0.8734	0.3679		0.03044	0.006776
Streptococcus	0.1098	0.0571		0.01223	0.01138
Staphylococcus	0.0243	0.005539		0.01524	0.002063
