# Supplementary material for: Peptidoglycan-Chi3l1 interaction shapes gut microbiota in intestinal mucus layer
Source: eLife. 2024 Oct 7;13:RP92994. doi: 10.7554/eLife.92994 (PMC11458176; doi:10.7554/eLife.92994)
Supplement: Figure 4—figure supplement 1—source data 1. [file elife-92994-fig4-figsupp1-data1.xlsx]

## Sheet: Figure4-figure supplement 1A
WT	Chil1-/-
7.741	10.031
12.111	20.392
4.833	16.467
8.367	11.921
7.105	8.697
4.718	6.864
7.634	8.003
3.182	15.899
4.362	11.704
3.426	12.429
3.438	14.629
3.765	14.936
7.667	10.983
5.457	6.163
3.74	9.887
3.912	9.941
10.368	7.547
7.641	8.232
13.516	5.136
17.189	3.378
13.062
7.476
13.977
1.666
1.02
1.402

## Sheet: Figure4-figure supplement 1B
WT						Chil1-/-
	The width of three points under each field of view (top, middle and bottom)			mean width(um)			The width of three points under each field of view (top, middle and bottom)			mean width(um)
F1	48.16	26.86	40.92	38.6467		F1	25.21	30.14	30.87	28.74
	39.98	32.23	45.05	39.0867			33.82	20.13	18.5	24.15
	45.98	43.5	42.5	43.9933			33.85	33.5	27.6	31.65
	42.52	44.02	34.33	40.29			20.07	13.11	18.77	17.3167
F2	33.57	32.87	43.42	36.62			39.98	19.78	14.85	24.87
	32.96	41.47	48.33	40.92			11.94	13.78	28.96	18.2267
	42.05	33.33	35.18	36.8533			41.35	32.07	23.4	32.2733
	38.05	46.37	36.31	40.2433		F2	18.55	31.93	55.82	35.4333
	32.29	32.32	28.67	31.0933			49.09	34.66	16.95	33.5667
F4	31.24	29.29	27.66	29.3967			16.36	40.44	18.03	24.9433
	26.72	37.15	37.23	33.7			23.55	32.95	25.43	27.31
	38.67	30.45	29.82	32.98			22.11	16.07	17.77	18.65
F5	37.72	22.81	32.52	31.0167		F3	21.04	13.86	17.67	17.5233
	33.68	29.43	33.19	32.1			12.14	14.34	17.59	14.69
	32.28	34.11	30.31	32.2333			34.33	24.11	27.44	28.6267
F6	36.58	34.8	35.05	35.4767			24.71	25.1	31.26	27.0233
	52.88	49.76	52.52	51.72			19.69	17.27	16.38	17.78
	39.5	29.3	29	32.6		F4	21.58	18.63	14.2	18.1367
	35.56	27.27	52.15	38.3267			18.46	17.41	17.92	17.93
	25.05	32.16	41.18	32.7967			18.44	15.94	13.83	16.07
F7	28.74	48.42	40.32	39.16		F5	21.19	21.77	61.61	34.8567
	19.88	36.87	29.85	28.8667			23.18	20.44	16.77	20.13
	39.98	34.27	29.69	34.6467			22.53	42.12	40.53	35.06
	34.54	28.84	47.47	36.95			35.87	24.7	42.88	34.4833
	27.66	39.52	48.9	38.6933			44.38	43.62	31.23	39.7433
	40.05	41.9	38.46	40.1367
	26.8	64.96	34.33	42.03
	61.36	41.34	65.72	56.14
