# Supplementary material for: Peptidoglycan-Chi3l1 interaction shapes gut microbiota in intestinal mucus layer
Source: eLife. 2024 Oct 7;13:RP92994. doi: 10.7554/eLife.92994 (PMC11458176; doi:10.7554/eLife.92994)
Supplement: Figure 4—source data 3. [file elife-92994-fig4-data3.xlsx]

## Sheet: Figure4E
Raw data		Sort out data							Raw data		Sort out data
Sample Name	CT	CT mean	Sample Name	CT mean	pg/ul	pg(50ul system)	pg/cm2		Sample Name	CT	CT mean	Sample Name	CT mean	pg/ul	pg(50ul system)	pg/cm2
WT1 ileum mucus	Undetermined		G+ 2022.2.22						WT1 ileum mucus	23.2054	23.2437	G+ 2023.2.13
WT1 ileum mucus	Undetermined		WT2 ileum mucus	16.5812	0.140731	7.03655	1.9546		WT1 ileum mucus	22.8538		WT1 ileum mucus	23.2437	0.00180804	0.0904019	0.0251116
WT1 ileum mucus	37.4804		WT3 ileum mucus	17.9172	0.0587713	2.93857	0.816269		WT1 ileum mucus	23.2821		WT3 ileum mucus	22.3498	0.00324311	0.162156	0.0450432
wt2 ileum mucus	16.6497	16.5812	WT5 ileum mucus	18.1696	0.0498312	2.49156	0.6921		WT2 ileum mucus	Undetermined		WT4 ileum mucus	18.6963	0.0353193	1.76597	0.490547
wt2 ileum mucus	16.5126		KO1 ileum mucus	17.8259	0.0623859	3.1193	0.866471		WT2 ileum mucus	Undetermined		WT5 ileum mucus	21.7401	0.00483087	0.241543	0.0670954
wt2 ileum mucus	15.9498		KO2 ileum mucus	29.4539	3.12211e-05	0.00156106	0.000433627		WT2 ileum mucus	Undetermined		KO1 ileum mucus	24.4903	0.000800521	0.0400261	0.0111184
WT3 ileum mucus	18.1216		WT1 colon mucus	13.6788	0.938103	46.9051	23.4526		WT3 ileum mucus	22.3541	22.3498	KO2 ileum mucus	26.5205	0.000212368	0.0106184	0.00294956
WT3 ileum mucus	17.998	17.9172	WT2 colon mucus	13.7312	0.906524	45.3262	22.6631		WT3 ileum mucus	22.5112		KO3 ileum mucus	23.591	0.00144087	0.0720437	0.0200121
WT3 ileum mucus	17.8363		WT3 colon mucus	13.3723	1.14616	57.3082	28.6541		WT3 ileum mucus	22.3454		KO4 ileum mucus	21.126	0.00721636	0.360818	0.100227
WT4 ileum mucus	Undetermined		WT4 colon mucus	12.2493	2.38779	119.39	59.6948		WT4 ileum mucus	18.8533	18.6963	WT1 colon mucus	15.3259	0.319673	15.9836	7.99182
WT4 ileum mucus	Undetermined		KO1 colon mucus	17.9771	0.0565134	2.82567	1.41283		WT4 ileum mucus	18.5393		WT2 colon mucus	15.6071	0.265999	13.2999	6.64996
WT4 ileum mucus	25.5476		KO2 colon mucus	14.3717	0.596433	29.8217	14.9108		WT4 ileum mucus	18.1607		WT3 colon mucus	18.4848	0.0405553	2.02777	1.01388
WT5 ileum mucus	18.1615	18.1696							WT5 ileum mucus	21.6927	21.7401	WT4 colon mucus	17.8176	0.0627255	3.13627	1.56814
WT5 ileum mucus	18.0237								WT5 ileum mucus	21.7874		WT5 colon mucus	16.8129	0.12095	6.04749	3.02375
WT5 ileum mucus	18.1778								WT5 ileum mucus	22.0503		KO1 colon mucus	18.1703	0.0498083	2.49041	1.24521
KO1 ileum mucus	17.9979	17.8259							KO1 ileum mucus	24.6241	24.4903	KO2 colon mucus	17.3423	0.0855763	4.27881	2.13941
KO1 ileum mucus	17.6538								KO1 ileum mucus	23.8951		KO3 colon mucus	21.6461	0.00513688	0.256844	0.128422
KO1 ileum mucus	17.2669								KO1 ileum mucus	24.3564		KO4 colon mucus	22.2356	0.00349427	0.174713	0.0873567
KO2 ileum mucus	29.273	29.4539							KO2 ileum ucus	26.5678	26.5205
KO2 ileum mucus	27.6268								KO2 ileum ucus	26.3543
KO2 ileum mucus	29.6347								KO2 ileum ucus	26.4732
KO3 ileum mucus	34.1848								KO3 ileum muces	23.7658
KO3 ileum mucus	32.5765								KO3 ileum muces	23.6363	23.591
KO3 ileum mucus	34.0101								KO3 ileum muces	23.5458
WT1 colon mucus	13.8181								KO4 lieum mucus	20.9417
WT1 colon mucus	13.6002	13.6788							KO4 lieum mucus	21.1732	21.126
WT1 colon mucus	13.7574								KO4 lieum mucus	21.0789
WT2 colon mucus	13.7252	13.7312							WT1 colon mucus	15.4996	15.3259
WT2 colon mucus	13.7371								WT1 colon mucus	15.9914
WT2 colon mucus	12.6284								WT1 colon mucus	15.1522
WT3 colon mucus	14.2879								WT2 colon mucus	15.5342
WT3 colon mucus	13.2972	13.3723							WT2 colon mucus	15.589	15.6071
WT3 colon mucus	13.4473								WT2 colon mucus	15.6252
WT4 colon mucus	12.2867	12.2493							WT3 colon mucus	18.6067	18.4848
WT4 colon mucus	12.212								WT3 colon mucus	17.9473
WT4 colon mucus	11.2125								WT3 colon mucus	18.3629
KO1 colon mucus	18.0104	17.9771							WT4 colon mucus	17.5072
KO1 colon mucus	17.9438								WT4 colon mucus	17.7988	17.8176
KO1 colon mucus	15.7291								WT4 colon mucus	17.8363
KO2 colon mucus	14.7675								WT5 colon mucus	16.9056	16.8129
KO2 colon mucus	14.4265	14.3717							WT5 colon mucus	16.7203
KO2 colon mucus	14.3169								WT5 colon mucus	16.1925
h2o	33.1538								KO1 colon mucus	18.0102	18.1703
h2o	32.5149								KO1 colon mucus	17.6752
h2o	32.9134								KO1 colon mucus	18.3305
									KO2 colon mucus	17.4174
									KO2 colon mucus	17.2995	17.3423
									KO2 colon mucus	17.3851
									KO3 colon mucus	21.5663	21.6461
									KO3 colon mucus	22.402
									KO3 colon mucus	21.7259
									KO4 colon mucus	23.3257
									KO4 colon mucus	22.1007	22.2356
									KO4 colon mucus	22.3706
									h2o	34.9872
									h2o	33.9563
									h2o	32.8587

## Sheet: Figure4F
Raw data		Sort out data
2023.2.28 data reduction of WT and Chil1-/- mice mucus lactobacillus
Sample Name	CT	CT mean	lactobacillus 2023.2.28
KO1 ileum mucus lacto	16.6472	16.6824	Sample Name	CT mean	pg/ul	pg(50ul system)	pg/cm2
KO1 ileum mucus lacto	16.7176		KO1 ileum mucus	16.6824	0.13172	6.58602	1.82945
KO1 ileum mucus lacto	16.9067		KO2 ileum mucus	18.1139	0.0516807	2.58404	0.717788
KO2 ileum mucus lacto	17.9758	18.1139	KO3 ileum mucus	19.7038	0.0182826	0.91413	0.253925
KO2 ileum mucus lacto	18.252		KO4 ileum mucus	20.923	0.00824037	0.412019	0.11445
KO2 ileum mucus lacto	17.6063		KO5 ileum mucus	21.9604	0.00418298	0.209149	0.0580969
KO3 ileum mucus lacto	19.7771	19.7038	KO6 ileum mucus	21.3689	0.00615723	0.307861	0.0855171
KO3 ileum mucus lacto	19.6304		WT1 ileum mucus	15.7046	0.249585	12.4793	3.46646
KO3 ileum mucus lacto	19.2527		WT2 ileum mucus	16.4177	0.156601	7.83003	2.17501
KO4 ileum mucus lacto	20.7557		WT3 ileum mucus	16.1869	0.182104	9.10518	2.52922
KO4 ileum mucus lacto	20.9129	20.923	WT4 ileum mucus	17.4765	0.0783863	3.91931	1.0887
KO4 ileum mucus lacto	20.9332		WT5 ileum mucus	15.8268	0.230418	11.5209	3.20024
KO5 ileum mucus ;acto	21.9937	21.9604	WT6 ileum mucus	17.9961	0.0558182	2.79091	0.775252
KO5 ileum mucus ;acto	21.9271		WT7 ileum mucus	15.7571	0.241169	12.0585	3.34957
KO5 ileum mucus ;acto	22.2828
KO6 ileum mucus lacto	21.7041		KO1 colon mucus	15.7868	0.236529	11.8265	5.91323
KO6 ileum mucus lacto	21.3473	21.3689	KO2 colon mucus	16.8276	0.119796	5.98978	2.99489
KO6 ileum mucus lacto	21.3905		KO3 colon mucus	18.9374	0.03017	1.5085	0.754249
WT1 ileum mucus lacto	16.0438		KO4 colon mucus	21.003	0.00782059	0.39103	0.195515
WT1 ileum mucus lacto	15.5416	15.7046	KO5 colon mucus	22.4845	0.00296965	0.148482	0.0742412
WT1 ileum mucus lacto	15.8676		KO6 colon mucus	20.6264	0.0100036	0.500181	0.250091
WT2 ileum mucus lacto	16.8607		WT1 colon mucus	15.8458	0.227574	11.3787	5.68935
WT2 ileum mucus lacto	16.4084	16.4177	WT2 colon mucus	16.8034	0.121705	6.08524	3.04262
WT2 ileum mucus lacto	16.427		WT3 colon mucus	16.6032	0.138723	6.93614	3.46807
WT3 ileum mucus lacto	16.0698	16.1869	WT4 colon mucus	16.3815	0.160346	8.01731	4.00865
WT3 ileum mucus lacto	16.3039		WT5 colon mucus	16.6981	0.130374	6.51871	3.25936
WT3 ileum mucus lacto	15.65		WT6 colon mucus	16.466	0.151738	7.58689	3.79345
WT4 ileum mucus lacto	17.6618	17.4765	WT7 colon mucus	16.2113	0.17922	8.96099	4.48049
WT4 ileum mucus lacto	17.2912
WT4 ileum mucus lacto	18.0557
WT5 ileum mucus lacto	15.8244	15.8268
WT5 ileum mucus lacto	15.8415
WT5 ileum mucus lacto	15.8292
WT6 ileum mucus lacto	18.6226
WT6 ileum mucus lacto	18.0126	17.9961
WT6 ileum mucus lacto	17.9795
WT7 ileum mucus lacto	15.8124	15.7571
WT7 ileum mucus lacto	15.9744
WT7 ileum mucus lacto	15.7017
KO1 colon mucus lacto	15.6859
KO1 colon mucus lacto	15.7631	15.7868
KO1 colon mucus lacto	15.8104
KO2 colon mucus lacto	16.7833	16.8276
KO2 colon mucus lacto	16.872
KO2 colon mucus lacto	17.0749
KO3 colon mucus lacto	19.2149
KO3 colon mucus lacto	18.9456	18.9374
KO3 colon mucus lacto	18.9292
KO4 colon mucus lacto	21.0593	21.003
KO4 colon mucus lacto	20.9468
KO4 colon mucus lacto	21.217
KO5 colon nucus lacto	22.6869
KO5 colon nucus lacto	22.4576	22.4845
KO5 colon nucus lacto	22.5114
KO6 colon mucus lacto	20.6062	20.6264
KO6 colon mucus lacto	20.6465
KO6 colon mucus lacto	20.7252
WT1 colon mucus lacto	15.7195	15.8458
WT1 colon mucus lacto	15.9722
WT1 colon mucus lacto	15.4883
WT2 colon mucus lacto	16.7881	16.8034
WT2 colon mucus lacto	16.8187
WT2 colon mucus lacto	16.527
WT3 colon mucus lacto	16.7766
WT3 colon mucus lacto	16.527	16.6032
WT3 colon mucus lacto	16.6793
WT4 colon mucus lacto	16.1995
WT4 colon mucus lacto	16.3271	16.3815
WT4 colon mucus lacto	16.436
WT5 colon mucus lacto	16.26
WT5 colon mucus lacto	16.699	16.6981
WT5 colon mucus lacto	16.6972
WT6 colon mucus lacto	16.7214
WT6 colon mucus lacto	16.4321	16.466
WT6 colon mucus lacto	16.4998
WT7 colon mucus lacto	16.1502
WT7 colon mucus lacto	16.2106	16.2113
WT7 colon mucus lacto	16.212
h2o	33.9845
h2o	33.1209
h2o	Undetermined
