# Supplementary material for: Peptidoglycan-Chi3l1 interaction shapes gut microbiota in intestinal mucus layer
Source: eLife. 2024 Oct 7;13:RP92994. doi: 10.7554/eLife.92994 (PMC11458176; doi:10.7554/eLife.92994)
Supplement: Figure 5—figure supplement 1—source data 1. [file elife-92994-fig5-figsupp1-data1.xlsx]

## Sheet: Figure5-figure supplement 1B
	mice
	Villin-cre(2022/9/18)						IECΔChil1(2022/8/26)
colon length(cm)	5.3	6.2	5.4	6.2	6.9	7.1	6.5	6.6	6.8	7.5
