# Supplementary material for: Peptidoglycan-Chi3l1 interaction shapes gut microbiota in intestinal mucus layer
Source: eLife. 2024 Oct 7;13:RP92994. doi: 10.7554/eLife.92994 (PMC11458176; doi:10.7554/eLife.92994)
Supplement: Figure 5—source data 1. [file elife-92994-fig5-data1.xlsx]

## Sheet: Figure5A
Gene	CHI3L1
Geneid	ENSG00000133048
CMCD140	86.304
CMCD147	53.9235
CMCD152	72.5588
CMCD154	14.9637
CMCD159	136.807
CMCD161	28.9762
CMCD174	0
CMCD196	7.75407
CMCD198	98.5106
CMCD203	109.441
CMCD211	18418.3
CMCD227	8982.07
CMCD240	57.0929
CMCD259	289.246
CMCD270	734.235
CMCD275	27.142
CMCD282	345.121
CMCD286	1851.69
CMCD287	240.101
CMCD294	255.901
CMCD327	13953.9
CMCD335	3922.57
CMCD337	296.036
CMCD357	1593.77
CMCD398	5.48865
CMCD403	1095.2
CMCD422	558.081
CMCD426	0
CMCD71	41.2689	R276CMSA	4875.98
CMCD72	5124.2	R286CMSA	1453.16
CMCD76	877.695	R292CMSA	119.848
CMCD88	5018.51	R371CMSA	98.9755
CMSA256	46.1825	R308CMSA	28.2455
CMSA316	405.085	R347CMSA	106.46
CMUC110	121.291
CMUC192	1606.33	CM317	11.7005
CMUC199	506.185
CMUC200	6529.05
CMUC208	114.049
CMUC231	40.1281
CMUC234	2856.03
CMUC285	6257.79
CMUC291	2587.62
CMUC295	12.5206
CMUC299	7824.25
CMUC301	4768.68
CMUC307	7644.74
CMUC313	35.4531
CMUC314	521.093
CMUC323	803.744
CMUC324	932.925
CMUC331	51.3665
CMUC333	25.8491
CMUC334	1362.53
CMUC346	152.702
CMUC352	980.113
CMUC360	73.4725
CMUC363	1047.44
CMUC365	529.893
CMUC366	614.372
CMUC368	280.08
CMUC377	906.797
CMUC379	0
CMUC380	6761.02
CMUC383	631.11
CMUC394	123.682
CMUC419	184.787
CMUC427	2126.98
CMUC428	883.87
CMUC431	3335.29
CMUC435	757.334
CMUC439	50.5271
CMUC89	4501.26
CS219	73.8926
CS256	13.4128
CS257	25.3625
CS259	376.837
CS261	24.9019
CS266	0
CS270	5.77656
CS277	107.364
CS288	83.655
CS290	237.345
CS292	19.5642
CS293	6.12996
CS301	71.9162
CS306	9.992
CS308	147.865
CS315	20.1941
CS317	0
CS322	99.9578
CS327	288.051
CS328	66.3722
CS330	0
CS331	4.21709
CS335	107.341
CS338	659.502
CS339	0
CS343	722.393
CS344	65.4865
CS350	0
CS351	57.9774
CS361	62.3437
CS388	508.402
CS396	22.3216
CS405	13.5937
CS415	28.7287
CS424	6.94827
IM293	2128.04
IM296	126.633
IM297	8.89543
IM300	45.3808
IM305	25.2501
IM309	167.144
IM310	98.2197
IM311	860.004
IM316	28.1828
IM320	588.955
IM330	61.0235
IM332	38.2087
IM340	0
IM348	43.7858
IM354	24.4708
IM356	14.9276
IM364	80.4554
IM372	19.9796
IM374	290.366
IM376	13.18
IM381	190.19
IM382	1097.28
IM385	218.699
IM390	387.304
IM397	2.83238
IM404	125.502
IM409	266.021
IM412	347.779
IM421	170.224
IM425	0
IM432	738.418
IM438	148.446
IM442	95.8304
IM445	1611.16
IM448	174.137
IM449	486.717
IM451	233.703
IMSA256	47.3885
IMSA276	13515.4
IMSA286	3873.1
IMSA343	33.1526
R347IMSA	416.452
R316IMSA	44.1986
R292IMSA	91.5079
IS_238	2.54706
IS238	63.1462
IS243	1.25847
IS253	20.4518
IS283	53.0606
IS322	30.5285
IS399	0
IS418	0
IS430	0
IS437	4.137
IS444	2.22485

## Sheet: Figure5C
	mice bodyweight
days after DSS treated	Villin-cre					IECΔChil1
	F1	F2	F3	F4	F5	F1	F2	F3	F4	F5
0	20.17	20.04	17.64	19.35	18.05	22.27	23.19	17.33	19.07	17.92
1	20.45	20.64	17.38	19.44	18.12	21.93	22.83	17.24	19.13	18.01
2	20.7	20.54	17.14	19.59	18.43	22.34	22.96	18.11	19.24	18.12
3	20.36	20.85	17.17	19.56	19.01	21.19	22.28	16.84	19.26	18.32
4	19.81	20.06	17.76	19.06	18.75	21.39	22.73	17.51	19.68	18.32
5	19.68	19.84	18.4	19.72	18.34	22.29	23.03	17.28	19.61	17.71
6	19.79	19.61	17.89	19.35	19.23	19.42	20.82	16.1	19.35	17.55
7	19.4	19.63	17.55	18.72	19.42	19.69	19.96	15.89	18.83	17.54
Villin-cre		F1			F2		F3				F4			F5
	body weight	innitial bodyweight	weight change(%)	body weight	innitial bodyweight	weight change(%)	body weight	innitial bodyweight	weight change(%)	body weight	innitial bodyweight	weight change(%)	body weight	innitial bodyweight	weight change(%)
0	20.17	20.17	1	20.04	20.04	1	17.64	17.64	1	19.35	19.35	1	18.05	18.05	1
1	20.45	20.17	1.01388	20.64	20.04	1.02994	17.38	17.64	0.985261	19.44	19.35	1.00465	18.12	18.05	1.00388
2	20.7	20.17	1.02628	20.54	20.04	1.02495	17.14	17.64	0.971655	19.59	19.35	1.0124	18.43	18.05	1.02105
3	20.36	20.17	1.00942	20.85	20.04	1.04042	17.17	17.64	0.973356	19.56	19.35	1.01085	19.01	18.05	1.05319
4	19.81	20.17	0.982152	20.06	20.04	1.001	17.76	17.64	1.0068	19.06	19.35	0.985013	18.75	18.05	1.03878
5	19.68	20.17	0.975706	19.84	20.04	0.99002	18.4	17.64	1.04308	19.72	19.35	1.01912	18.34	18.05	1.01607
6	19.79	20.17	0.98116	19.61	20.04	0.978543	17.89	17.64	1.01417	19.35	19.35	1	19.23	18.05	1.06537
7	19.4	20.17	0.961824	19.63	20.04	0.979541	17.55	17.64	0.994898	18.72	19.35	0.967442	19.42	18.05	1.0759
IECΔChil1		F1			F2		F3				F4			F5
	body weight	innitial bodyweight	weight change(%)	body weight	innitial bodyweight	weight change(%)	body weight	innitial bodyweight	weight change(%)	body weight	innitial bodyweight	weight change(%)	body weight	innitial bodyweight	weight change(%)
0	22.27	22.27	1	23.19	23.19	1	17.33	17.33	1	19.07	19.07	1	17.92	17.92	1
1	21.93	22.27	0.984733	22.83	23.19	0.984476	17.24	17.33	0.994807	19.13	19.07	1.00315	18.01	17.92	1.00502
2	22.34	22.27	1.00314	22.96	23.19	0.990082	18.11	17.33	1.04501	19.24	19.07	1.00891	18.12	17.92	1.01116
3	21.19	22.27	0.951504	22.28	23.19	0.960759	16.84	17.33	0.971725	19.26	19.07	1.00996	18.32	17.92	1.02232
4	21.39	22.27	0.960485	22.73	23.19	0.980164	17.51	17.33	1.01039	19.68	19.07	1.03199	18.32	17.92	1.02232
5	22.29	22.27	1.0009	23.03	23.19	0.9931	17.28	17.33	0.997115	19.61	19.07	1.02832	17.71	17.92	0.988281
6	19.42	22.27	0.872025	20.82	23.19	0.897801	16.1	17.33	0.929025	19.35	19.07	1.01468	17.55	17.92	0.979353
7	19.69	22.27	0.884149	19.96	23.19	0.860716	15.89	17.33	0.916907	18.83	19.07	0.987415	17.54	17.92	0.978795
body weight change(%)(days:initial)	Villin-cre					IECΔChil1
0	1	1	1	1	1	1	1	1	1	1
1	1.01388	1.02994	0.985261	1.00465	1.00388	0.984733	0.984476	0.994807	1.00315	1.00502
2	1.02628	1.02495	0.971655	1.0124	1.02105	1.00314	0.990082	1.04501	1.00891	1.01116
3	1.00942	1.04042	0.973356	1.01085	1.05319	0.951504	0.960759	0.971725	1.00996	1.02232
4	0.982152	1.001	1.0068	0.985013	1.03878	0.960485	0.980164	1.01039	1.03199	1.02232
5	0.975706	0.99002	1.04308	1.01912	1.01607	1.0009	0.9931	0.997115	1.02832	0.988281
6	0.98116	0.978543	1.01417	1	1.06537	0.872025	0.897801	0.929025	1.01468	0.979353
7	0.961824	0.979541	0.994898	0.967442	1.0759	0.884149	0.860716	0.916907	0.987415	0.978795
colon length(cm)	6.1	6.6	5.9	5.6	7.2	4.4	4.3	4.8	4.9	5.2

## Sheet: Figure5D
colon length
normal		Colitis
Villin-cre	IEC∆Chil1	Villin-cre		IEC∆Chil1
7.6	7.4	6.6	mice DOB: 2023.3.15	4.4	mice DOB: 2021.12.15
7.6	7.8	6.1		4.3
7.2	7.4	7.2		4.8
7.9	7.6	5.9	mice DOB: 2023.2.15	4.9	mice DOB: 2023.2.15
8	7.6	5.6		5.2
7.9	6.8

## Sheet: Figure5G
body weight change raw data		IECΔChil1 ABX+FMT(from Villin-cre)						IECΔChil1 ABX+lactobacillus (FMT:Villin-cre)
	Days after DSS treated												Villin-cre			IECΔChil1
	0	21.7	18.83	21.72	22.35	24.1	23.17	19.63	19.69	19.81	19.83	18.85	23.93	20.41	20.74	19.23	21.26	23.55
	1	21.7	19.6	20.15	22.3	24.22	23.32	20.13	20.37	20.36	19.86	18.74	23.96	20.26	21.25	19.18	21.27	23.31
	2	21.67	20.13	20.35	22.96	24.42	23.53	19.89	20.27	20.18	20.31	18.92	24.13	19.82	21.07	19.47	20.99	22.85
	3	22.41	21.02	19.89	23.54	24.62	23.85	19.48	20.18	19.84	20.91	19.05	24.74	19.95	21.65	19.62	21.62	23.21
	4	22.41	20.35	19.92	23.29	24.91	23.82	19.79	20.26	19.82	20.78	18.86	24.7	20.54	20.97	19.76	21.05	23.63
	5	22.53	19.71	19.78	22.59	23.65	23.64	19.81	20.38	19.74	20.47	18.71	24.18	21.47	20.53	19.56	20.72	22.69
	6	21.54	19.81	19.06	21.85	23.22	22.69	20.16	20.48	20.23	20.57	18.69	24.16	21.32	20.84	19.31	20.04	22.31
	7	20.89	19.61	18.32	20.6	22.62	22.45	19.52	19.89	19.79	20.83	19.37	24.67	20.42	20.51	18.75	20.07	21.64
		IECΔChil1 ABX+FMT(from Villin-cre) body weight change(%)						ABX+lactobacillus (FMT:Villin-cre) body weight change(%)
data reduction	Days after DSS treated												Villin-cre			IECΔChil1
	0	1	1	1	1	1	1	1	1	1	1	1	1	1	1	1	1	1
	1	1	1.04	0.93	1.01115	0.963696	1.00743	1.02	1.03	1.03	1	0.99	1.001	0.992651	1.02459	1	0.97	0.99
	2	1	1.07	0.94	1.01115	1.01603	1.02276	1.01	1.03	1.02	1.02	1	1.008	0.971093	1.01591	1.01	0.96	1.05
	3	1.03	1.12	0.92	1.00291	0.981612	1.04134	0.99	1.02	1	1.05	1.01	1.034	0.977462	1.04388	1.02	0.96	1.03
	4	1.05	1.08	0.92	1.01309	1.01367	1.01347	1	1.03	1	1.05	1	1.032	1.00637	1.01109	1.03	0.98	1.03
	5	1.04	1.05	0.91	0.99903	0.99057	1.00325	1.01	1.04	1	1.03	0.99	1.01	1.05194	0.989875	1.02	0.99	1.01
	6	0.99	1.05	0.88	1.02619	0.988213	0.99164	1.03	1.04	1.02	1.04	0.99	1.009	1.04459	1.00482	1	0.97	0.98
	7	0.96	1.04	0.84	1.01503	1.00471	1.00743	0.99	1.01	1	1.05	1.03	1.031	1.00049	0.98891	0.98	0.94	0.96

## Sheet: Figure5H
Colon length(cm)
Villin-cre DSS(2022.6)			IECΔChil1 DSS(2023.7)			IECΔChil1 DSS+FMT(2022.11"F1-3;2023.7"F4-6 )						IECΔChil1 DSS+Lac(2023.7"F1-3; 2023.7"F4-5)
F1	F2	F3	F1	F2	F3	F1	F2	F3	F4	F5	F6	F1	F2	F3	F4	F5
6	6.2	6.8	4	5.5	4.6	5.9	6.4	5.4	5.7	6.5	5.8	6	6	5.7	6.7	6.7
