# Supplementary material for: Peptidoglycan-Chi3l1 interaction shapes gut microbiota in intestinal mucus layer
Source: eLife. 2024 Oct 7;13:RP92994. doi: 10.7554/eLife.92994 (PMC11458176; doi:10.7554/eLife.92994)
Supplement: Supplementary file 1. [file elife-92994-supp1.xlsx]

## Sheet: genotyping primers
Aim genes	PCR No.	Primer No.	Sequence	Band Size
flox	① 5’arm	F1(JS05000-Chil1-5wt-tF1)	CTTGTTCAGCCAAGGTGATGGGTA	WT:270bp targeted:375bp
		R1(JS05000-Chil1-5wt-tR1)	CTACCTGATTGCTGGGGCTCATTA
		R1(JS05000-Chil1-5wt-tR1)	CTACCTGATTGCTGGGGCTCATTA
	② 3’arm	F2(JS15000-Chil1-3wt-F1)	CCAGTATTTAGAGGCAGAGAGATGGTG	WT:283bp targeted:384bp
		R2(JS15000-Chil1-3wt-R1)	CTCGAATTCAGAAATCTGCCTGCCT
Chil1-/-	①	F1(JS05000-Chil1-5wt-tF1)	CTTGTTCAGCCAAGGTGATGGGTA	WT: 2960 bp Targeted: ~256 bp
		R1(JS05000-Chil1-3wt-tR1)	CTCGAATTCAGAAATCTGCCTGCCT
	②	F2(JS15000-Chil1-wt-F1)	CTGTTAGTTGCACCTTGGAGCAGTCA	WT: 309 bp Targeted:0 bp
		R2(JS15000-Chil1-wt-R1)	CAGATATAGGAGAACATCCAGTCTGGG
Chil1-reporte	①	EGE-YQH-063-A-WT-F	CAGTTTCCCAACCCCTCACCTC	Targeted:485~bp
		EGE-YQH-063-A-Mut-R	AAGAAGTCGTGCTGCTTCATGTGGT
	②	EGE-YQH-063-A-WT-F	CAGTTTCCCAACCCCTCACCTC	WT:323 Targeted:1106~bp
		EGE-YQH-063-A-WT-R	CTACCCTAGTTCCCTGTTCTCCA
Cre	Cre①	Cre1	AGGTTCGTTCACTCATGGA	Cre:250bp Internal Control (Fabpi)=480bp
		Cre2	TTCGACCAGTTTAGTTACCC
	IntC500②	IntC500F	CCTCCGGAGAGCAGCGATTAAAAGTGTCAG
		IntC500R	TAGAGCTTTGCCACATCACAGGTCATTCAG

## Sheet: qPCR primers
Targeted bacteria	Primer No.	Sequence
Universal	27F	AGAGTTTGATCCTGGCTCAG
	1492R	GGTTACCTTGTTACGACTT
Gram-positive	928F–firm	TGAAACTYAAGGAATTGACG
	1040-firmR	ACCATGCACCACCTGTC
Lactobacillus	F	TGGAAACAGGTGCTAATACCG
	R	GTCCATTGTGGAAGATTCCC
