# Supplementary figures and images for: Peptidoglycan-Chi3l1 interaction shapes gut microbiota in intestinal mucus layer
Source: eLife journal article supplement (doi:10.7554/elife.92994), 2024-02-02

Figure4—source data 1

Figure4C

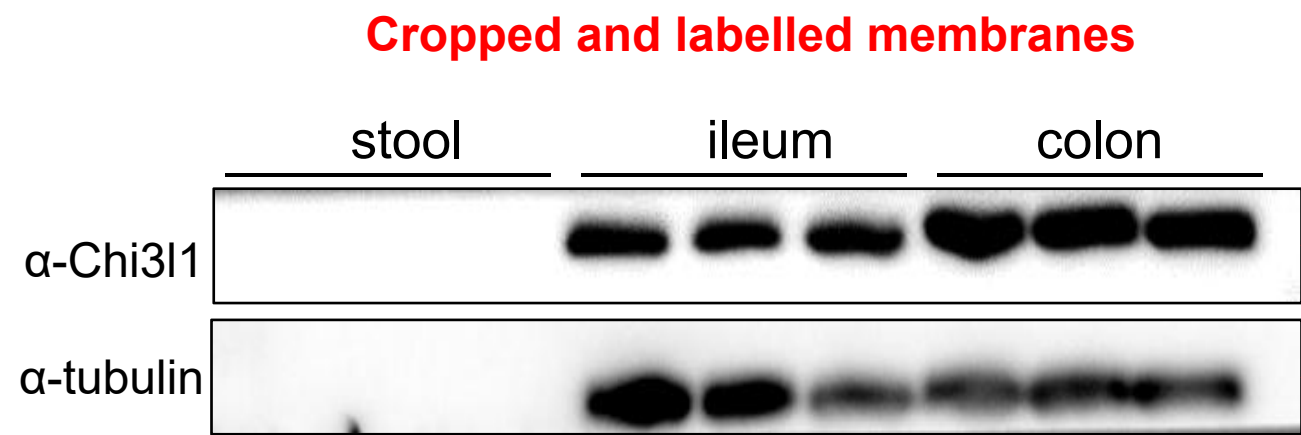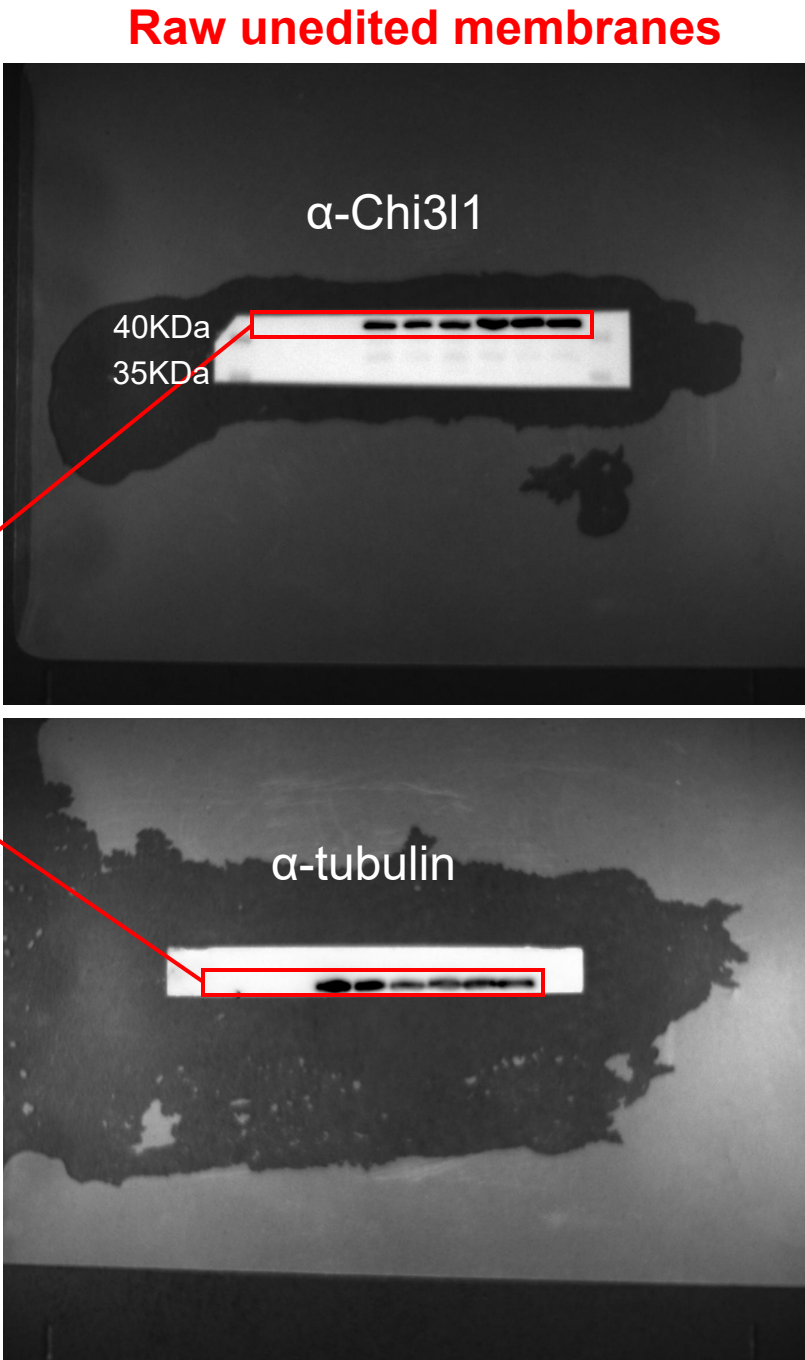

Figure4—source data 1

Figure4D

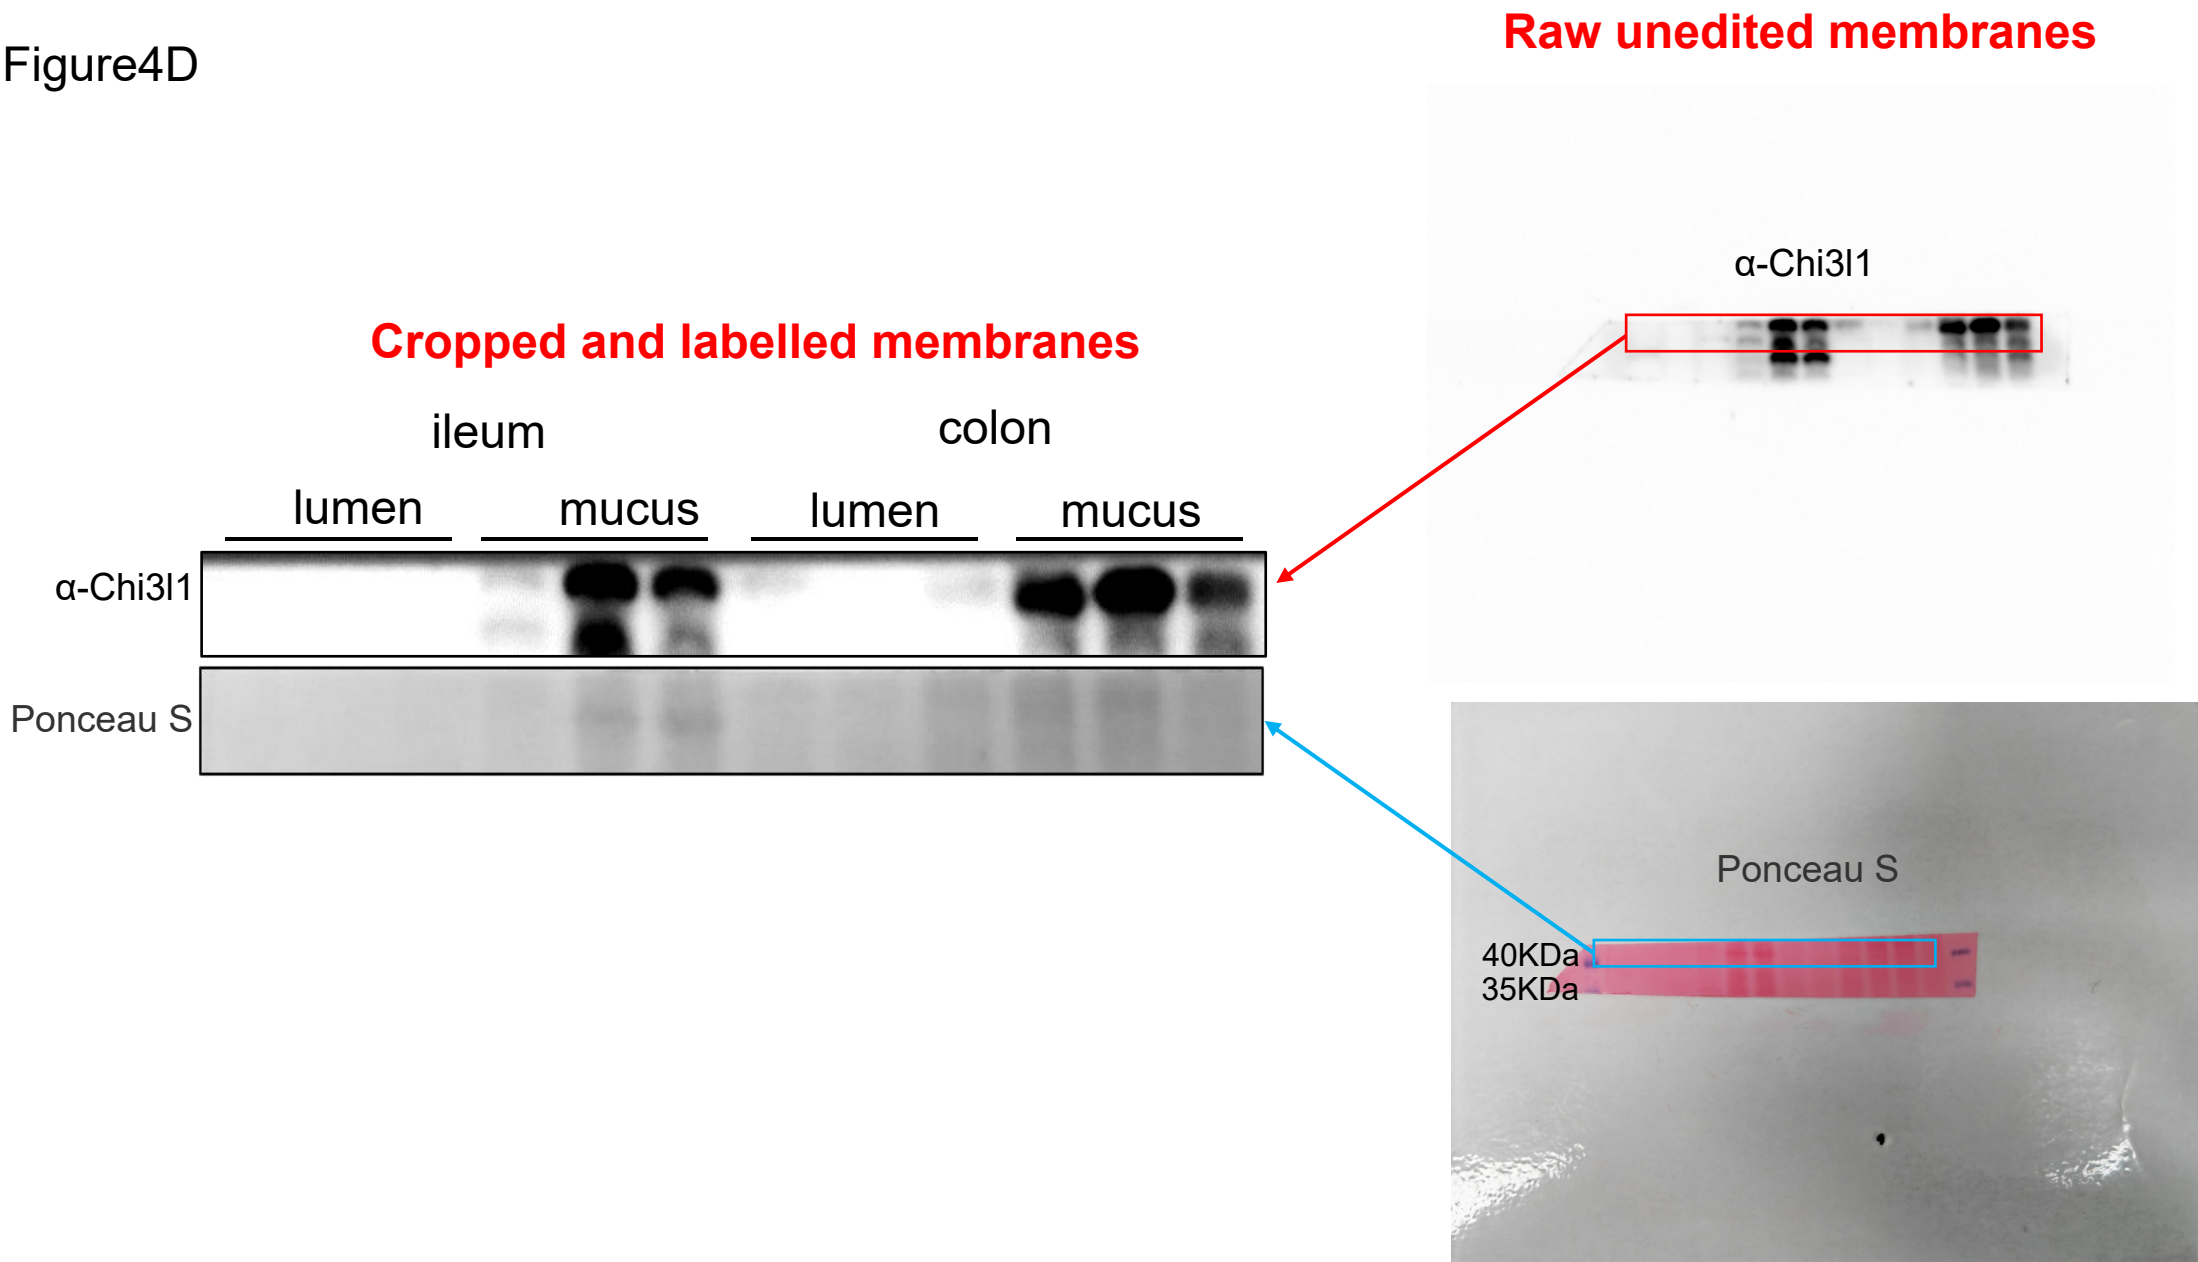

Supplement: fig4-data1 [file elife-92994-fig4-data1-v1.zip]
